# Supplementary material for: NADPH oxidase 2 limits amplification of IL-1β–G-CSF axis and an immature neutrophil subset in murine lung inflammation
Source: PubMed Central journal article supplement — Blood Adv. 2022 Sep 16;7(7):1225–40. doi: 10.1182/bloodadvances.2022007652 (PMC10111367; doi:10.1182/bloodadvances.2022007652), 2022-09-16
Supplement: BLOODA_ADV-2022-007652-mmc1.pdf [file BLOODA_ADV-2022-007652-mmc1.pdf]

## Supplemental methods

### Blood counts and analysis

Blood was collected by cardiac puncture in mice. Complete blood count (CBC) was measured by Hemavet 950FS (Drew Scientific). Percentage of neutrophils was analyzed by differential test. Absolute neutrophil count (ANC) were determined in peripheral blood by CBC and differential. Some samples were also analyzed by flow cytometry, with ACK lysing buffer (Gibco) used to lyse red blood cell prior to analysis of leukocyte markers, and neutrophils were identified as CD45<sup>+</sup>CD11b<sup>+</sup>Ly6G<sup>+</sup>.<sup>1</sup>

### Preparation of lung and marrow cell suspensions

For analysis of single cell lung suspensions, the right lung inferior lobe was minced and then digested with 5 mg/ml type I collagenase (Worthington) and 1 mg/ml DNaseI (Worthington) in RPMI1640 (Corning) at 37 °C for 45 min and subsequently passed through a 70  $\mu$ m cell strainer. ACK lysing buffer (Gibco) was used for red blood cell lysis<sup>1</sup>. Bone marrow cells were flushed from the femurs, filtered through 70  $\mu$ m cell strainer and red blood cells were lysed with ACK lysing buffer (Gibco).<sup>2</sup>

### Bronchoalveolar lavage

Bronchoalveolar lavage (BAL) samples were obtained by three sequential one ml lavages with ice cold PBS with 2mM EDTA and 2% FBS. The 1<sup>st</sup> ml of BAL supernatant was frozen at -80°C for ELISA. After red cell lysis with ACK lysis buffer (Gibco), pooled cells from all 3 ml were used to enumerate cell counts by hemocytometer and the leukocyte differential using Wright-Giemsa stained cytopins.

### ELISA

BAL and plasma cytokines were analyzed using Mouse IL-1 $\beta$  ELISA kit, Mouse IL-6 ELISA kit, Mouse CXCL1 ELISA kit, Mouse CXCL2 ELISA kit and Mouse G-CSF ELISA kit (all from R&D systems).

### Neutrophil depletion during zymosan-induced lung inflammation

Neutrophil depletion followed a double antibody-based protocol<sup>3,4</sup>, as previously described<sup>1</sup>. Mice were injected IP with 200  $\mu$ g Anti-Ly6G antibody (clone: 1A8, BioXcell) on days 0 and 2 and 100  $\mu$ g Anti-Rat IgGk antibody (clone: MAR18.5, BioXcell) on day 1. Mice were challenged with 20  $\mu$ g zymosan IN 4 hours after Anti-Ly6G antibody IP injection on day 2. Mice were euthanized 18 hours after zymosan challenge and evaluated for neutrophil depletion in peripheral blood obtained by cardiac puncture. White blood cell counts (WBC) were analyzed using a Hemavet and % of neutrophils was scored by Wright-Giemsa stained blood smears.<sup>1</sup>

### Flow cytometry

BAL and lung single cell suspensions were incubated with anti-mouse CD16/32 (clone 2.4G2, BioXcell) to block Fc-receptors, and stained as outlined below. Data were collected on FACScan (BD) or LSRFortessa (BD) and analyzed by FlowJo (Tree Star Inc.).

For regular BAL and lung single cell staining: BV510 Rat anti-mouse CD45 antibody (clone 30-F11, BD Horizon), V450 Rat anti-mouse Ly6G antibody (clone 1A8, BD Horizon), PE-Cy7 Hamster anti-mouse CD11c antibody (clone HL3, BD Pharmingen), APC Rat anti-mouse CD11b antibody (clone M1/70, eBioscience), PE Rat anti-mouse siglec-F antibody (clone E50-2440, BD Pharmingen), PerCP/Cy5.5 Rat anti-mouse Ly-6C antibody (clone HK1.4, Biolegend). Gating strategy was as shown previously.<sup>1</sup> Neutrophils were identified as CD45<sup>+</sup>Ly6G<sup>+</sup>CD11b<sup>+</sup>, and also confirmed by CD45<sup>+</sup>Ly6C<sup>int</sup>CD11b<sup>+</sup>. Eosinophils and alveolar macrophages were identified as CD45<sup>+</sup>CD11c<sup>-</sup>SiglecF<sup>+</sup> and CD45<sup>+</sup>CD11c<sup>+</sup>SiglecF<sup>+</sup> respectively.

For pro-IL-1 $\beta$  intracellular staining: BV510 Rat anti-mouse CD45 antibody, V450 Rat anti-mouse Ly6G antibody, PE-Cy7 Hamster anti-mouse CD11c antibody, APC Rat anti-mouse CD11b antibody, PE Rat anti-mouse Siglec-F antibody, PerCP/Cy5.5 Rat anti-mouse Ly6C antibody, FITC Rat anti-mouse IL-1 $\beta$  (Pro-form) (clone NJTEN3, Invitrogen), FITC mouse IgG1,  $\kappa$  Isotype control (clone MOPC-21, BD Pharmingen). Neutrophils were identified as CD45<sup>+</sup>SiglecF<sup>-</sup>CD11b<sup>+</sup>Ly6G<sup>+</sup>, eosinophils and AMs were identified as CD45<sup>+</sup>SiglecF<sup>+</sup>CD11c<sup>-</sup> and CD45<sup>+</sup>SiglecF<sup>+</sup>CD11c<sup>+</sup> respectively, Ly6C<sup>hi</sup> monocytes were identified as CD45<sup>+</sup>SiglecF<sup>-</sup>CD11b<sup>+</sup>Ly6C<sup>hi</sup>, other cells were identified CD45<sup>+</sup> cells except neutrophils, eosinophils, AMs and Ly6C<sup>hi</sup> monocytes. Gating strategy is shown in Fig. S1A and S1D.

In neutrophil depletion experiments: BV510 Rat anti-mouse CD45 antibody, V450 Rat anti-mouse Ly6G antibody, PE-Cy7 Hamster anti-mouse CD11c antibody, PE Rat anti-mouse siglec-F antibody, PerCP/Cy5.5 Rat anti-mouse Ly-6C antibody. Neutrophils were identified as CD45<sup>+</sup>SiglecF<sup>-</sup>Ly6C<sup>int</sup>, eosinophils and AMs were identified as CD45<sup>+</sup>SiglecF<sup>+</sup>CD11c<sup>-</sup> and CD45<sup>+</sup>SiglecF<sup>+</sup>CD11c<sup>+</sup> respectively, Ly6C<sup>hi</sup> monocytes were identified as CD45<sup>+</sup>SiglecF<sup>-</sup>Ly6C<sup>hi</sup>. Gating strategy is shown in Fig. S1E.

For analysis of marrow granulopoiesis: PE-Cy7 Rat anti-mouse Gr-1 antibody (clone RB6-8C5, Invitrogen), PE-Cy7 Rat anti-mouse B220 antibody (clone RA3-6B2, Invitrogen), PE-Cy7 Rat anti-mouse TER-119 antibody (clone TER-119, Invitrogen), PE-Cy7 Hamster anti-mouse CD3e antibody (clone 145-2C11, BD Pharmingen), BV421 Rat anti-mouse c-Kit antibody (clone 2B8, Biolegend), APC-Cy7 Rat anti-mouse CD16/32 antibody (clone 93, Biolegend), PerCP-Cy5.5 Rat anti-mouse Sca-1 antibody (clone D7, Invitrogen), FITC Rat anti-mouse CD34 antibody (clone RAM34, Invitrogen). LSK cells (Lin<sup>-</sup>Sca-1<sup>+</sup>c-kit<sup>+</sup>), granulocytic-monocytic progenitors (GMP, Lin<sup>-</sup>Sca-1<sup>-</sup>c-kit<sup>+</sup>CD34<sup>+</sup>CD16/32<sup>+</sup>), common myeloid progenitors (CMP, Lin<sup>-</sup>Sca-1<sup>-</sup>c-kit<sup>+</sup>CD34<sup>+</sup>CD16/32<sup>-</sup>) and megakaryocyte-erythroid progenitors (MEP, Lin<sup>-</sup>Sca-1<sup>-</sup>c-kit<sup>+</sup>CD34<sup>-</sup>CD16/32<sup>-</sup>) were determined by flow cytometry. Gating strategy is shown in Fig. S3A.

For analysis of committed neutrophil precursors: PE-Cy7 Rat anti-mouse B220 antibody, PE-Cy7 Rat anti-mouse TER-119 antibody, PE-Cy7 Hamster anti-mouse CD3e antibody, BV421 Rat anti-mouse c-Kit antibody, PE Rat anti-mouse Ly6G antibody (clone 1A8, BD Pharmingen), FITC Rat anti-mouse CD34 antibody. Myeloblast (Lin<sup>-</sup>c-Kit<sup>hi</sup>Ly6G<sup>-</sup>), promyelocyte (Lin<sup>-</sup>c-Kit<sup>int</sup>Ly6G<sup>-</sup>), myelocyte (Lin<sup>-</sup>c-Kit<sup>+</sup>Ly6G<sup>low</sup>), metamyelocyte (Lin<sup>-</sup>c-Kit<sup>+</sup>Ly6G<sup>int</sup>), and Ly6G<sup>hi</sup> PMN neutrophil (Lin<sup>-</sup>c-Kit<sup>+</sup>Ly6G<sup>hi</sup>) were identified by flow cytometry. Gating strategy is shown in Fig. S3B.

For CD101 staining experiments: BV510 Rat anti-mouse CD45 antibody, V450 Rat anti-mouse Ly6G antibody, AF-647 Rat anti-mouse CD101 antibody (clone 307707, BD Pharmingen), PE Rat anti-mouse CD11b antibody (clone M1/70, eBioscience). CD101<sup>neg</sup>

neutrophils (CD45<sup>+</sup>CD11b<sup>+</sup>Ly6G<sup>+</sup>CD101<sup>-</sup>) and CD101<sup>pos</sup> neutrophils (CD45<sup>+</sup>CD11b<sup>+</sup>Ly6G<sup>hi</sup>CD101<sup>+</sup>) were identified by flow cytometry. As naive mice have a very low content of CD101<sup>neg</sup> lung neutrophils, we studied only Ly6G<sup>+</sup>CD11b<sup>+</sup> CD101<sup>pos</sup> neutrophils from this group. Gating strategy for different tissues is shown in Fig. S4.

### **Histology and Immunohistochemistry**

In some experiments, the left lung was fixed by inflation using 10% formalin, dehydrated by ethanol, embedded in paraffin, and cut into 5  $\mu$ m sections for analysis of histology, as previously described.<sup>1</sup> Tissue sections were stained with H&E. For immunohistochemistry, tissue sections underwent antigen retrieval with Antigen unmasking solution (Vector Laboratories) with the manufacturer's protocol, and then were blocked with 2% gelatin from cold water fish skin (Sigma-Aldrich) for 1 hour at room temperature, incubated with a 1/500 dilution of Rabbit anti-mouse myeloperoxidase antibody (ab139748, Abcam) at 4°C overnight, followed by incubation with biotinylated goat anti-rabbit antibody (1/500 dilution for 1 hour at room temperature, Vector Laboratories) and detected by VECTASTAIN ABC kit (Vector Laboratories) and DAB peroxidase substrate kit (Vector Laboratories). Sections were counterstained with hematoxylin (Gill's formula, Vector Laboratories). The images were captured with NanoZoomer digital slide scanner (Hamamatsu Photonics, Japan). Images were analyzed by NDP.view2 software (Hamamatsu Photonics).

### **Immunofluorescence**

Formalin fixed, paraffin embedded lung tissue sections underwent antigen retrieval with Antigen unmasking solution (Vector Laboratories) with the manufacturer's protocol, and then were blocked with 2% gelatin from cold water fish skin (Sigma-Aldrich) for 1 hour at room temperature, incubated with 1/100 dilution of goat anti-mouse IL-1 $\beta$  antibody (Cat # AF-401-NA, R&D systems) and Rat anti-mouse Ly6G antibody (clone 1A8, Invitrogen) at 4°C overnight, followed by incubation with 1/500 dilution of AF488 donkey anti-goat IgG (Cat # A11055, Invitrogen) and 1/500 dilution of AF594 donkey anti-rat IgG (Cat # A21209, Invitrogen) for 1 hour at room temperature. 1  $\mu$ g/ml DAPI (Cat # 10236276001, Roche) was used for nuclear counterstaining. ProLong Gold antifade reagent (Cat # P36930, Invitrogen) was used as mounting media. Images were acquired by Zeiss Axio Imager M2 upright fluorescence microscope (Carl Zeiss Inc.), using an EC Plan-Neofluar 20X (NA 0.5) air objective (Carl Zeiss) with an ORCA-Flash 4.0 digital camera (Hamamatsu Photonics, Japan), and by ZEN 2 pro (blue edition) software for (Carl Zeiss) or acquired by Zeiss Axio Observer D1 inverted fluorescence microscope (Carl Zeiss Inc. Thornwood, NY), using an EC Plan-Neofluar 20X (NA 0.5) air objective (Carl Zeiss) with an AxioCam 503 dual color B/W digital camera (Carl Zeiss), and by ZEN 2.3 (blue edition) software. Images were further processed and analyzed using ImageJ (National Institutes of Health).

### **qPCR**

RNA from lung tissues was extracted with RNAeasy Plus Mini Kit (Cat # 74136, Qiagen). cDNA was synthesized by High-Capacity cDNA Reverse Transcription Kit (Cat # 4368813, Applied Biosystems). qPCR was performed using TaqMan Fast Universal PCR Master Mix (Cat # 4352042, Applied Biosystems) on a 7500 Fast Real-Time PCR system (Applied Biosystems) with the following primers purchased from Thermo Fisher: Csf3 Mm00438335\_g1, Il6 Mm00446190\_m1, Cxcl1 Mm04207460\_m1, Cxcl2 Mm00436450\_m1 and Gapdh

Mm99999915\_g1. Gapdh were used to normalize the expression of target genes as an internal control.

### RNA-sequencing and analysis.

RNA was prepared from sorted live (7-AAD-negative) neutrophils from lung single-cell suspensions. Neutrophils were identified as Live (7-AAD-negative) CD45<sup>+</sup>CD11b<sup>+</sup>Ly6G<sup>+</sup> along with CD101, and sorted as CD45<sup>+</sup>CD11b<sup>+</sup>Ly6G<sup>+</sup>CD101<sup>neg</sup> or CD45<sup>+</sup>CD11b<sup>+</sup>Ly6G<sup>+</sup>CD101<sup>pos</sup> cells on the FACSria Fusion cell sorter (BD). 50,000-200,000 cells/sample were sorted into RPMI1640 + 20% heat-inactivated FBS, and each group had three replicate samples. Total RNA was isolated using RNeasy Plus Micro Kit (Qiagen). All samples showed RNA integrity (RIN) of > 9.7. RNA-seq libraries were prepared using the Clontech SMARTer Kit. Samples were prepared according to library kit manufacturer's protocol, indexed, pooled, and sequenced on an Illumina NovaSeq 6000. RNA-seq reads were aligned to the Ensembl release 76 primary assembly for mouse. Ribosomal genes and genes not expressed in the smallest group size minus one samples greater than one count-per-million were excluded from further analysis. The TMM size factors and the matrix of counts were then imported into the R/Bioconductor package Limma.<sup>5</sup> Linear modeling (limma/voom) was used to compare gene expression across samples. Differential expression analysis was performed to analyze for differences between conditions and the results were filtered for only those genes with Benjamini-Hochberg false-discovery rate adjusted p-values less than or equal to 0.05. Heatmaps and Venn diagrams were created using R. Hallmark gene sets<sup>6</sup> were analyzed using generally applicable gene set enrichment (GAGE).<sup>7</sup>

### References

1. Song Z, Huang G, Chiquetto Paracatu L, et al. NADPH oxidase controls pulmonary neutrophil infiltration in the response to fungal cell walls by limiting LTB4. *Blood*. 2020;135(12):891-903.
2. Bagaitkar J, Pech NK, Ivanov S, et al. NADPH oxidase controls neutrophilic response to sterile inflammation in mice by regulating the IL-1 $\alpha$ /G-CSF axis. *Blood*. 2015;126(25):2724-2733.
3. Boivin G, Faget J, Ancey PB, et al. Durable and controlled depletion of neutrophils in mice. *Nat Commun*. 2020;11(1):2762.
4. Faget J, Boivin G, Ancey P-B, et al. Efficient and specific Ly6G<sup>+</sup> cell depletion: A change in the current practices toward more relevant functional analyses of neutrophils. *bioRxiv*. 2018:498881.
5. Ritchie ME, Phipson B, Wu D, et al. limma powers differential expression analyses for RNA-sequencing and microarray studies. *Nucleic Acids Res*. 2015;43(7):e47.
6. Liberzon A, Birger C, Thorvaldsdottir H, Ghandi M, Mesirov JP, Tamayo P. The Molecular Signatures Database (MSigDB) hallmark gene set collection. *Cell Syst*. 2015;1(6):417-425.
7. Luo W, Friedman MS, Shedden K, Hankenson KD, Woolf PJ. GAGE: generally applicable gene set enrichment for pathway analysis. *BMC Bioinformatics*. 2009;10:161.

**Fig. S1. Zymosan-induced lung inflammation in WT and CGD mice and flow cytometry analysis of pro IL-1 $\beta$ <sup>+</sup> cells and of antibody-mediated neutrophil depletion.**

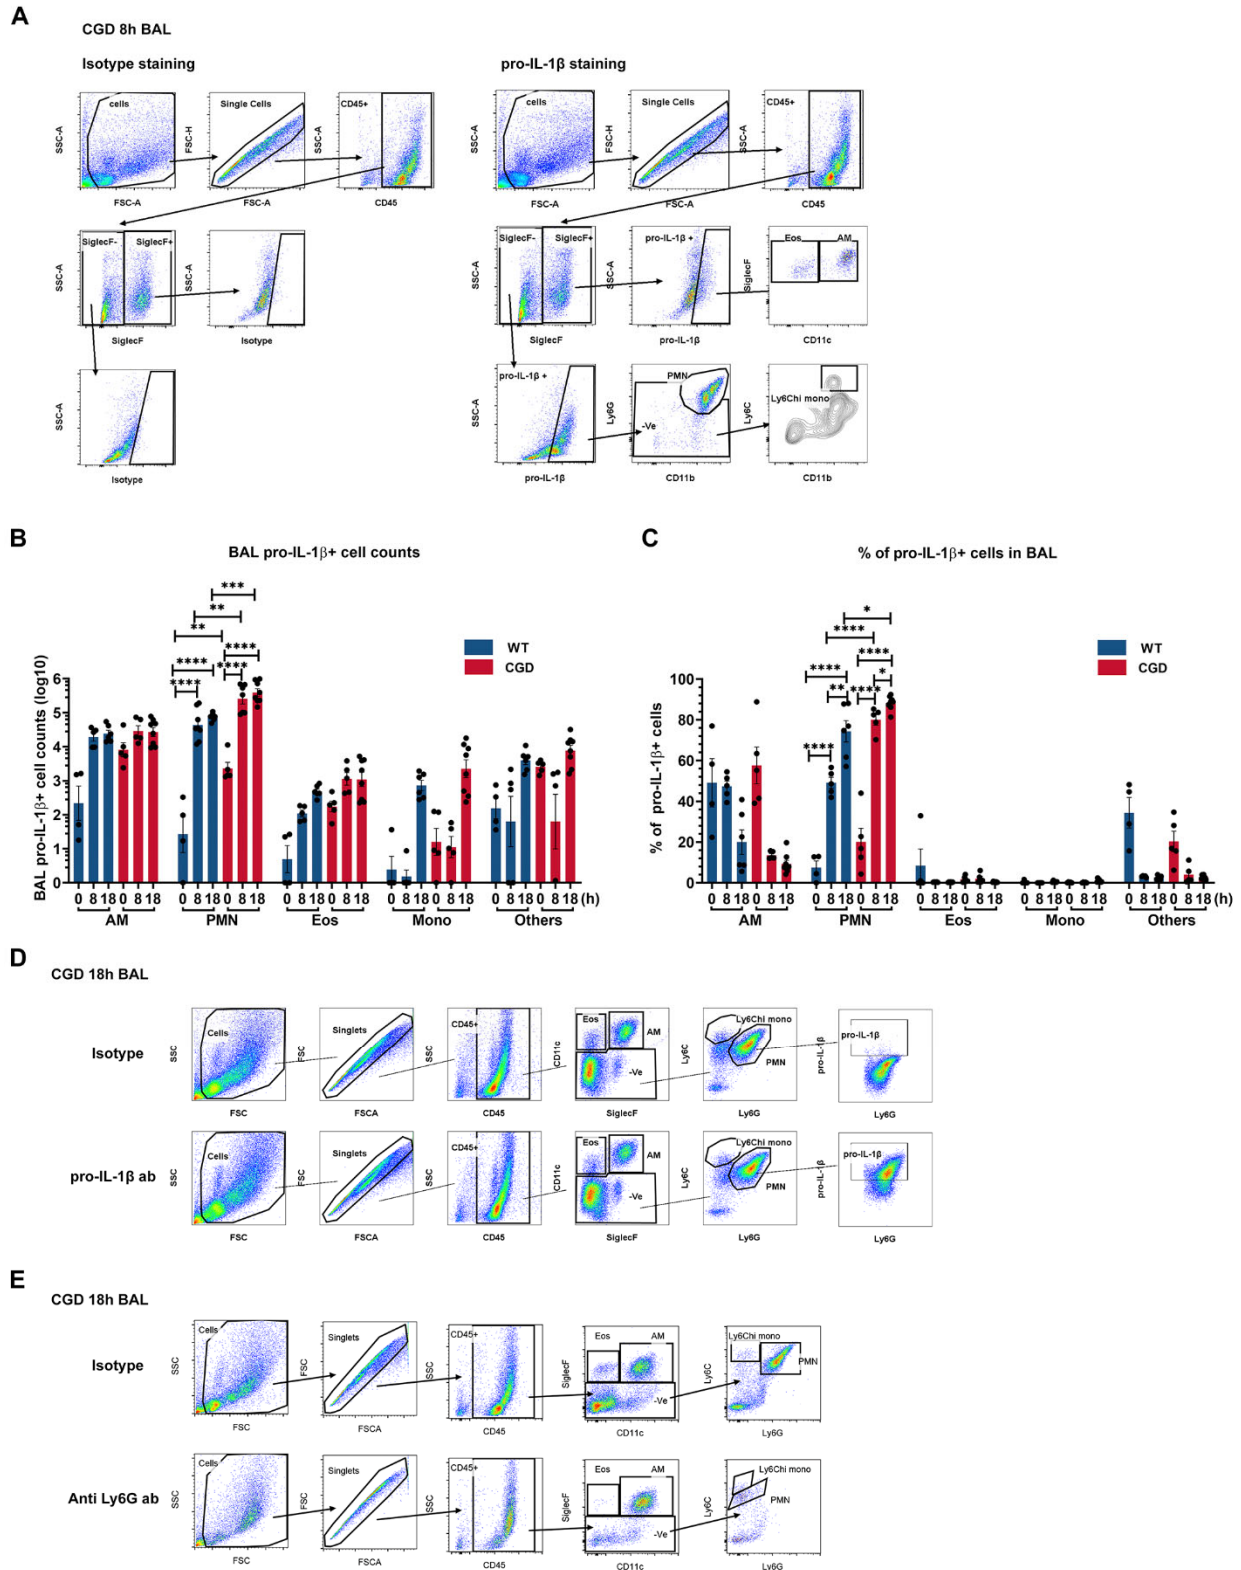



**Fig. S1.** WT and CGD mice were challenged with 20  $\mu$ g intranasal zymosan. BAL samples were collected at different time points and used for further analysis. (A) Representative gating strategy for identifying pro-IL-1 $\beta$ <sup>+</sup> cell composition in BAL at 8 hours after 20  $\mu$ g zymosan IN challenge. Due to high autofluorescence of alveolar macrophages (AMs), CD45<sup>+</sup> cells were firstly gated as SiglecF<sup>-</sup> and SiglecF<sup>+</sup> population, then Pro IL-1 $\beta$ <sup>+</sup> cells were further gated from each population. Upper panel, gating from Isotype control staining. Lower panel, gating from Pro-IL-1 $\beta$  staining. Percentage of pro-IL-1 $\beta$ <sup>+</sup> cells from CD45<sup>+</sup> cells was calculated by adding up the percentage of SiglecF<sup>+</sup> pro-IL-1 $\beta$ <sup>+</sup> and SiglecF<sup>-</sup> pro-IL-1 $\beta$ <sup>+</sup> cells from CD45<sup>+</sup> cells. Percentage of each cell population from CD45<sup>+</sup> pro-IL-1 $\beta$ <sup>+</sup> cells were further calculated using flow cytometry results. This gating is related to Figure 1C, Figure S1B and S1C. (B) BAL counts of pro-IL-1 $\beta$ <sup>+</sup> AMs, neutrophils, eosinophils, Ly6C<sup>hi</sup> monocytes, and remaining other cells were calculated from flow cytometry results for the percentage of pro-IL-1 $\beta$ <sup>+</sup> AMs, neutrophils, eosinophils, Ly6C<sup>hi</sup> monocytes, and other cells. (C) Percentage of pro-IL-1 $\beta$ <sup>+</sup> AMs, neutrophils, eosinophils, Ly6C<sup>hi</sup> monocytes, and others (CD45<sup>+</sup>SiglecF<sup>-</sup>Ly6G<sup>-</sup>Ly6C<sup>low</sup>- cells not further characterized) were determined by flow cytometry. (D) Representative flow cytometry gating of BAL pro-IL-1 $\beta$ <sup>+</sup> neutrophils from total neutrophils. Neutrophils were identified as CD45<sup>+</sup>SiglecF<sup>-</sup>Ly6G<sup>+</sup>Ly6C<sup>int</sup>, eosinophils and AMs were identified as CD45<sup>+</sup>SiglecF<sup>+</sup>CD11c<sup>-</sup> and CD45<sup>+</sup>SiglecF<sup>+</sup>CD11c<sup>+</sup> respectively, Ly6C<sup>hi</sup> monocytes were identified as CD45<sup>+</sup>SiglecF<sup>-</sup>Ly6G<sup>-</sup>Ly6C<sup>hi</sup>. This gating is related to Figure 1D and 1E. (E) Representative figure of flow cytometry gating of BAL cells to assess neutrophil depletion. Mice were sequentially injected IP with anti Ly6G or isotype and anti-Rat Kappa light chain prior to lung challenge with zymosan. Cell composition was determined by flow cytometry. Neutrophils were identified as CD45<sup>+</sup>SiglecF<sup>-</sup>Ly6C<sup>int</sup>, eosinophils and AMs were identified as CD45<sup>+</sup>SiglecF<sup>+</sup>CD11c<sup>-</sup> and CD45<sup>+</sup>SiglecF<sup>+</sup>CD11c<sup>+</sup> respectively, Ly6C<sup>hi</sup> monocytes were identified as CD45<sup>+</sup>SiglecF<sup>-</sup>Ly6C<sup>hi</sup>.

**Fig. S2. IL-1 $\beta$  neutralization does not affect zymosan-induced lung inflammation in CGD mice at 8 hours.**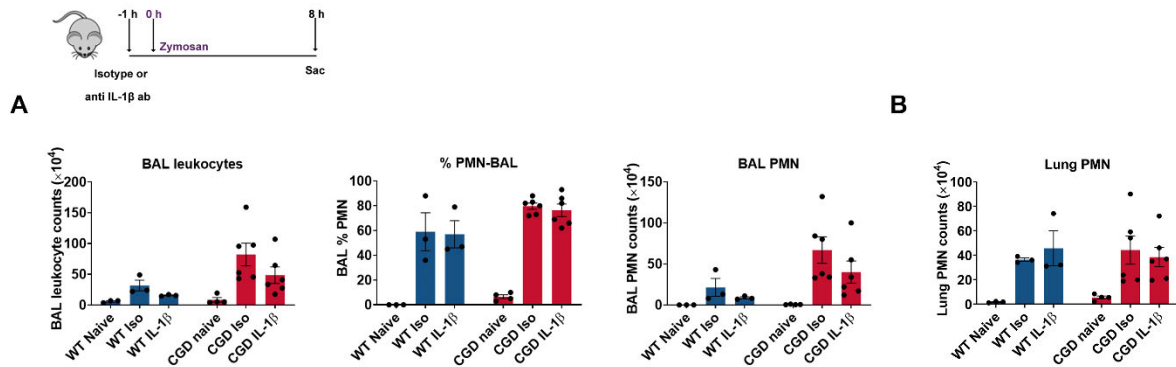

**Fig. S2.** (A-B) WT and CGD mice were injected intraperitoneally with anti-IL-1 $\beta$  ab or isotype, followed by IN instillation of 20  $\mu$ g zymosan after 1 hour. BAL and lung tissue were collected at 8 hours after zymosan challenge. (A) Total leukocyte counts from 3 ml BAL fluid. The percentage of neutrophils were identified by cytopsin. BAL PMN counts were calculated by cytopsin results. (B) Lung cells were counted from the right inferior lobe. PMN (CD45 $^+$ CD11b $^+$ Ly6G $^+$ ) counts were calculated by flow cytometry. WT,  $n \geq 3$  from 1 or more experiments; CGD,  $n \geq 4$  from 2 independent experiments. Data are means  $\pm$  standard error of the mean.

**Fig. S3. Flow cytometry analysis of granulopoiesis and neutrophil precursors in the marrow in zymosan-induced lung inflammation.**

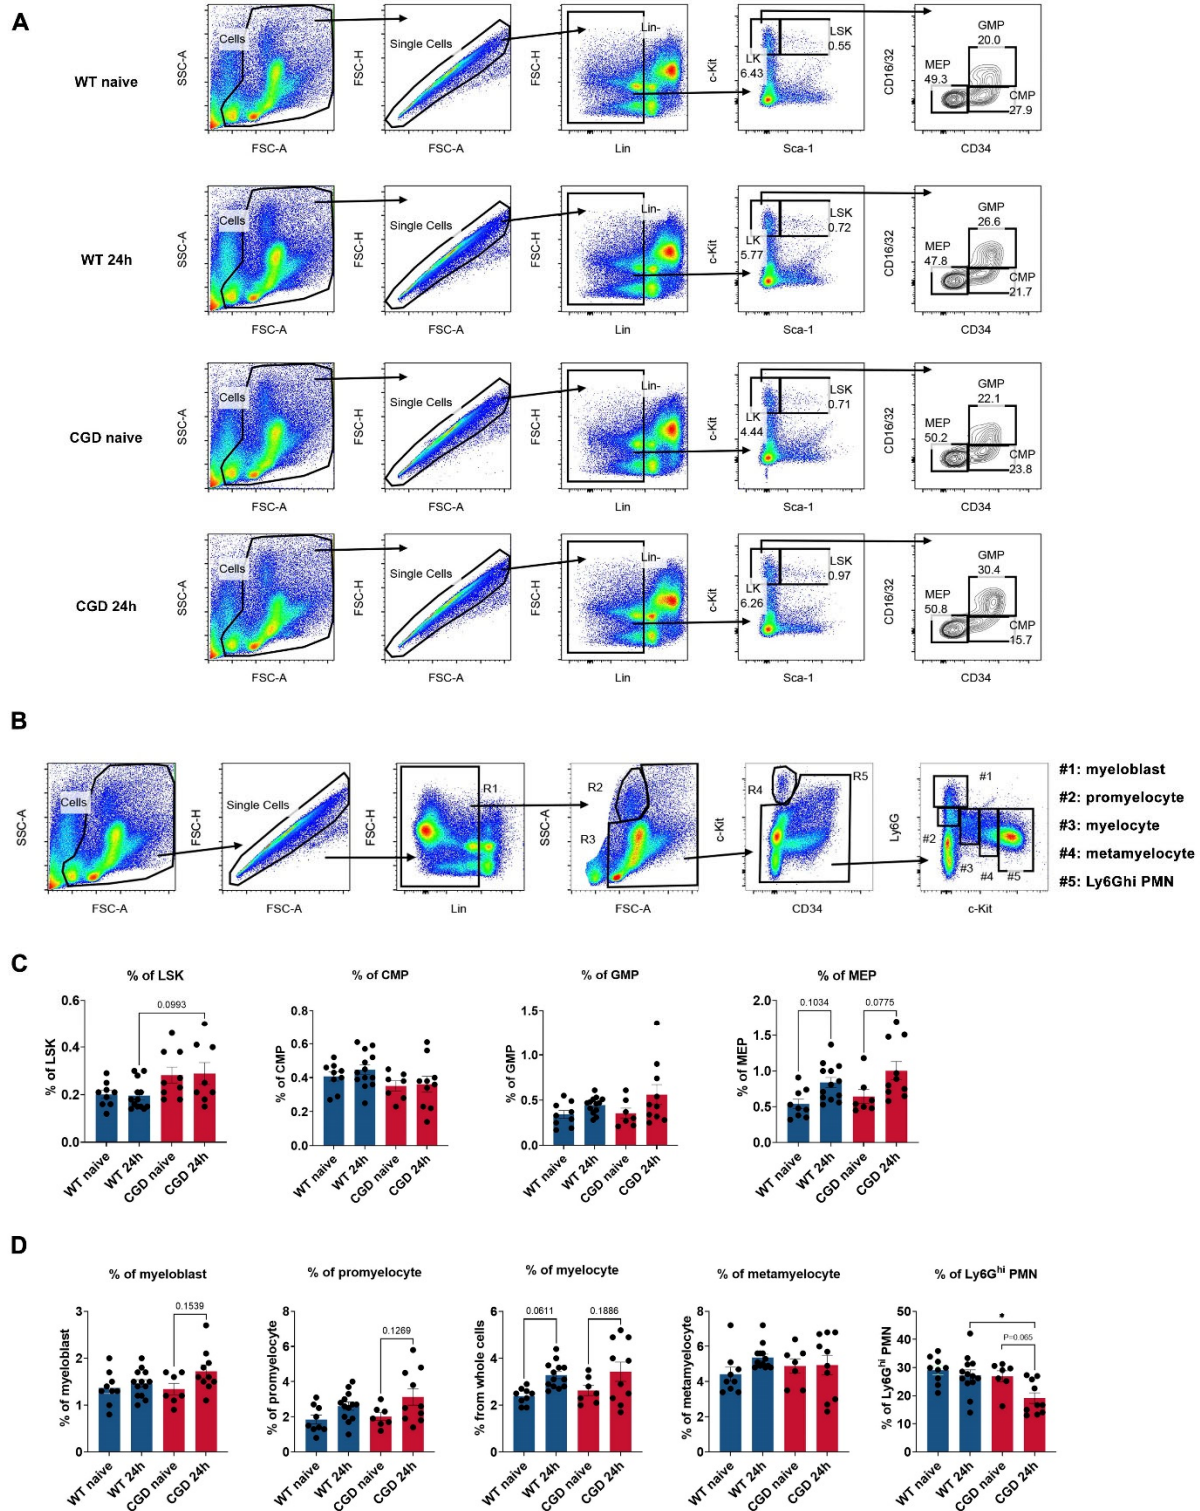



**Fig. S3.** WT and CGD mice were challenged with 20  $\mu$ g IN zymosan. Bone marrow cells were collected from naïve WT and CGD mice and at 24 hrs from mice challenged with 20  $\mu$ g intranasal zymosan. (A) Representative flow cytometry gating to identify different hematopoietic progenitors in naïve mice and zymosan challenged mice. Lineage makers were CD3, B220, TER-119 and Gr-1. (B) Representative flow cytometry showing gating to identify differentiation and maturation stages of marrow granulocytes in mice. #1, myeloblast; #2, promyelocyte; #3, myelocyte ; #4, metamyelocyte ; #5, Ly6G<sup>hi</sup> neutrophil. (C) Percentage of LSK cells, common myeloid progenitors (CMP), granulocytic-monocytic progenitors (GMP) and megakaryocyte-erythroid progenitors (MEP) were determined by flow cytometry. (D) Percentage of myeloblast, promyelocyte, myelocyte, metamyelocyte and Ly6G<sup>hi</sup> PMN were determined by flow cytometry.

**Fig. S4. Gating strategy to identify CD101<sup>neg</sup>Ly6G<sup>+</sup>CD11b<sup>+</sup> neutrophils in various tissues.**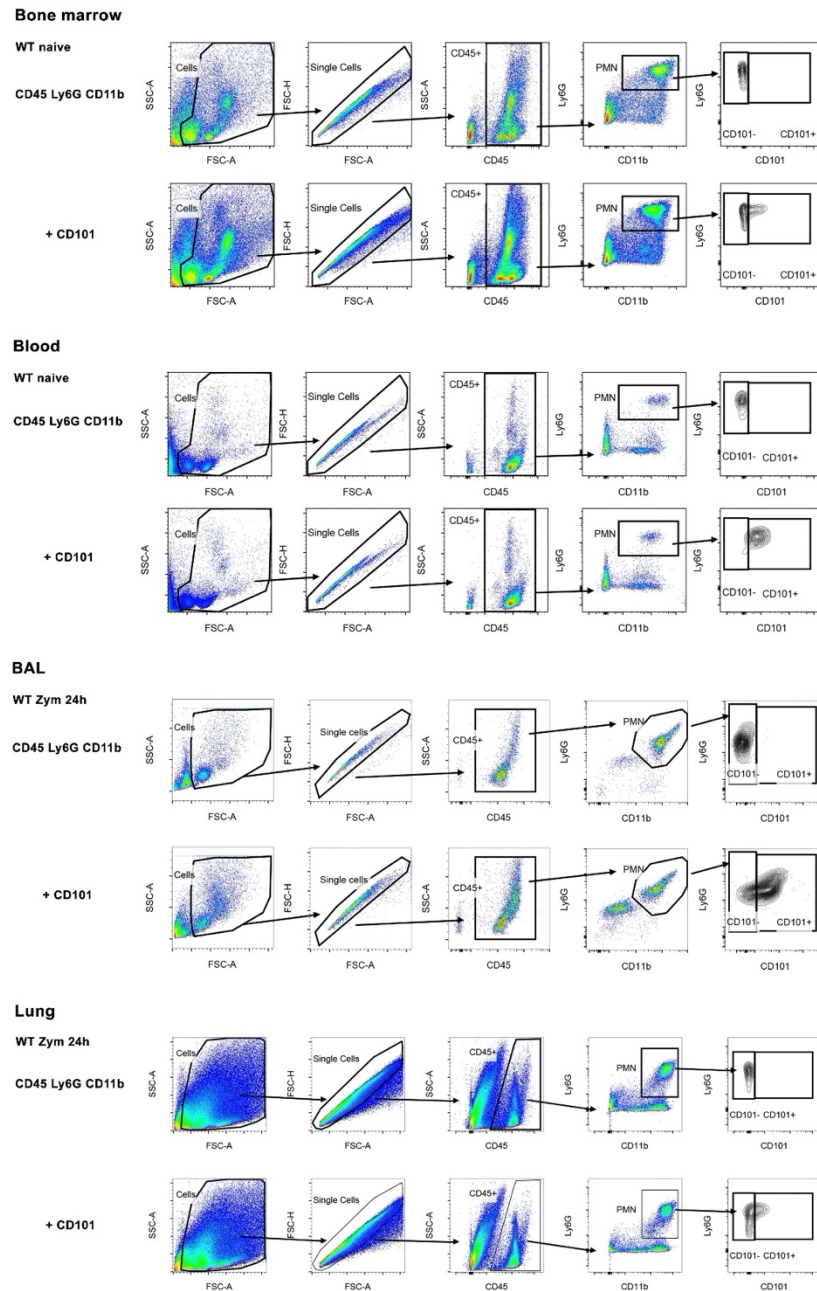

**Fig. S4.** Representative flow cytometry gating to identify CD101<sup>neg</sup>Ly6G<sup>+</sup>CD11b<sup>+</sup> neutrophils in the indicated tissues (bone marrow, blood, BAL and lung), showing examples from either naive WT mice or WT challenged with 20  $\mu$ g IN zymosan and samples collected 24 hours later. CD101 expression on CD11b<sup>+</sup>Ly6G<sup>+</sup> PMN were analyzed by flow cytometry and showed CD101<sup>neg</sup> PMN (CD45<sup>+</sup>CD11b<sup>+</sup>Ly6G<sup>+</sup>CD101<sup>neg</sup>) and CD101<sup>pos</sup> PMN (CD45<sup>+</sup>CD11b<sup>+</sup>Ly6G<sup>+</sup>CD101<sup>pos</sup>) populations.

**Fig. S5. Role of IL-1 $\beta$  and LTB $_4$  production on granulopoiesis and peripheral blood immature neutrophils following zymosan lung challenge in CGD mice.**

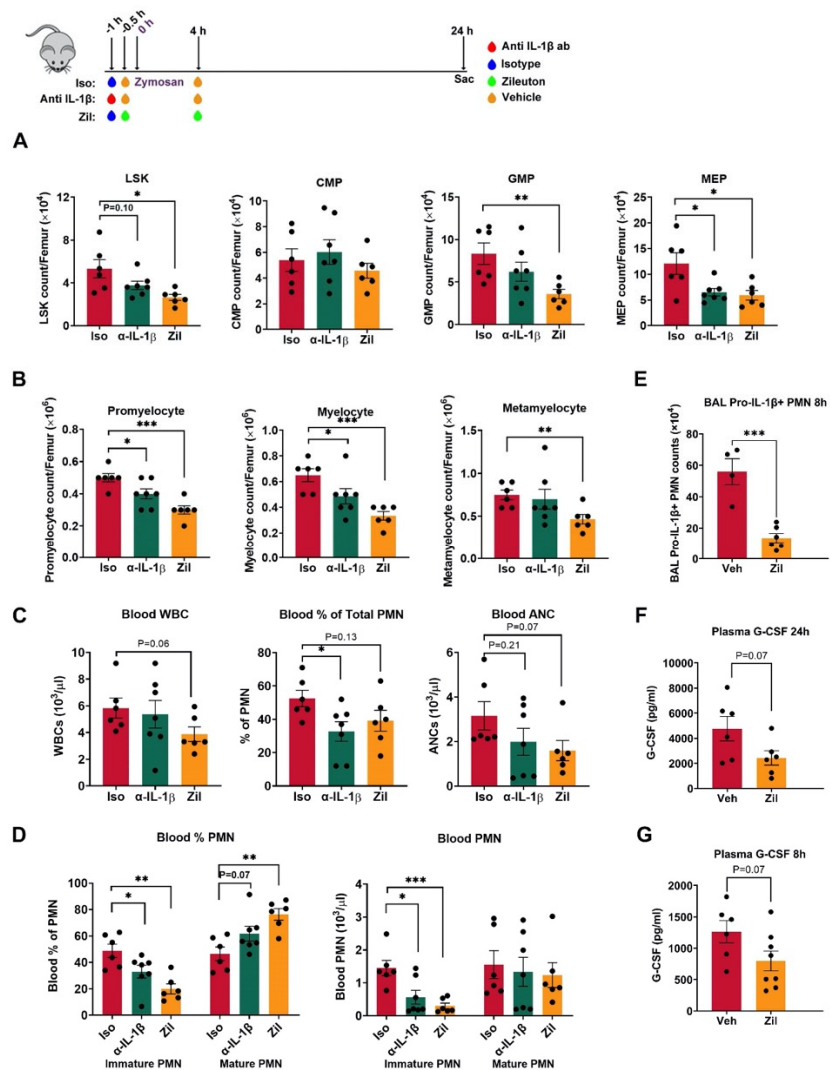

**Fig. S5.** (A-D) CGD mice were injected intraperitoneally with anti IL-1 $\beta$  ab or isotype 1 hour before 20  $\mu$ g zymosan challenge, or treated with zileuton or vehicle 30 minutes before and 4 hours after zymosan challenge, and studied at 24 hours. (A) LSK cells, CMP, GMP and MEP counts per femur were calculated by flow cytometry results. (B) Promyelocyte, myelocyte and metamyelocyte counts per femur were calculated by flow cytometry results. (C) Total WBC, percentage of PMN, and absolute neutrophil count (ANC) were determined in peripheral blood by complete blood count and differential. (D) Peripheral blood immature CD101<sup>neg</sup> PMN and mature CD101<sup>pos</sup> PMN were determined by flow cytometry, and immature PMN and mature PMN counts were calculated by flow cytometry results. (E-G) CGD mice were treated with

zileuton or vehicle 30 minutes before and 4 hours after 20  $\mu$ g zymosan challenge and studied at 8 hours or 24 hours. (E) Pro-IL-1 $\beta$ + PMN counts were calculated from flow cytometry results. (F-G) G-CSF level in plasma were determined by ELISA. (A-E) n  $\geq$  6 from 2 independent experiments. (F) n  $\geq$  4 from 2 independent experiments. (G) n  $\geq$  6 from 3 independent experiments. Data are means  $\pm$  standard error of the mean. \*P < 0.05; \*\*P < 0.01; \*\*\*P < 0.001, by student t test.

**Fig. S6. Transcriptomic analysis of lung neutrophils in WT and CGD mice.**

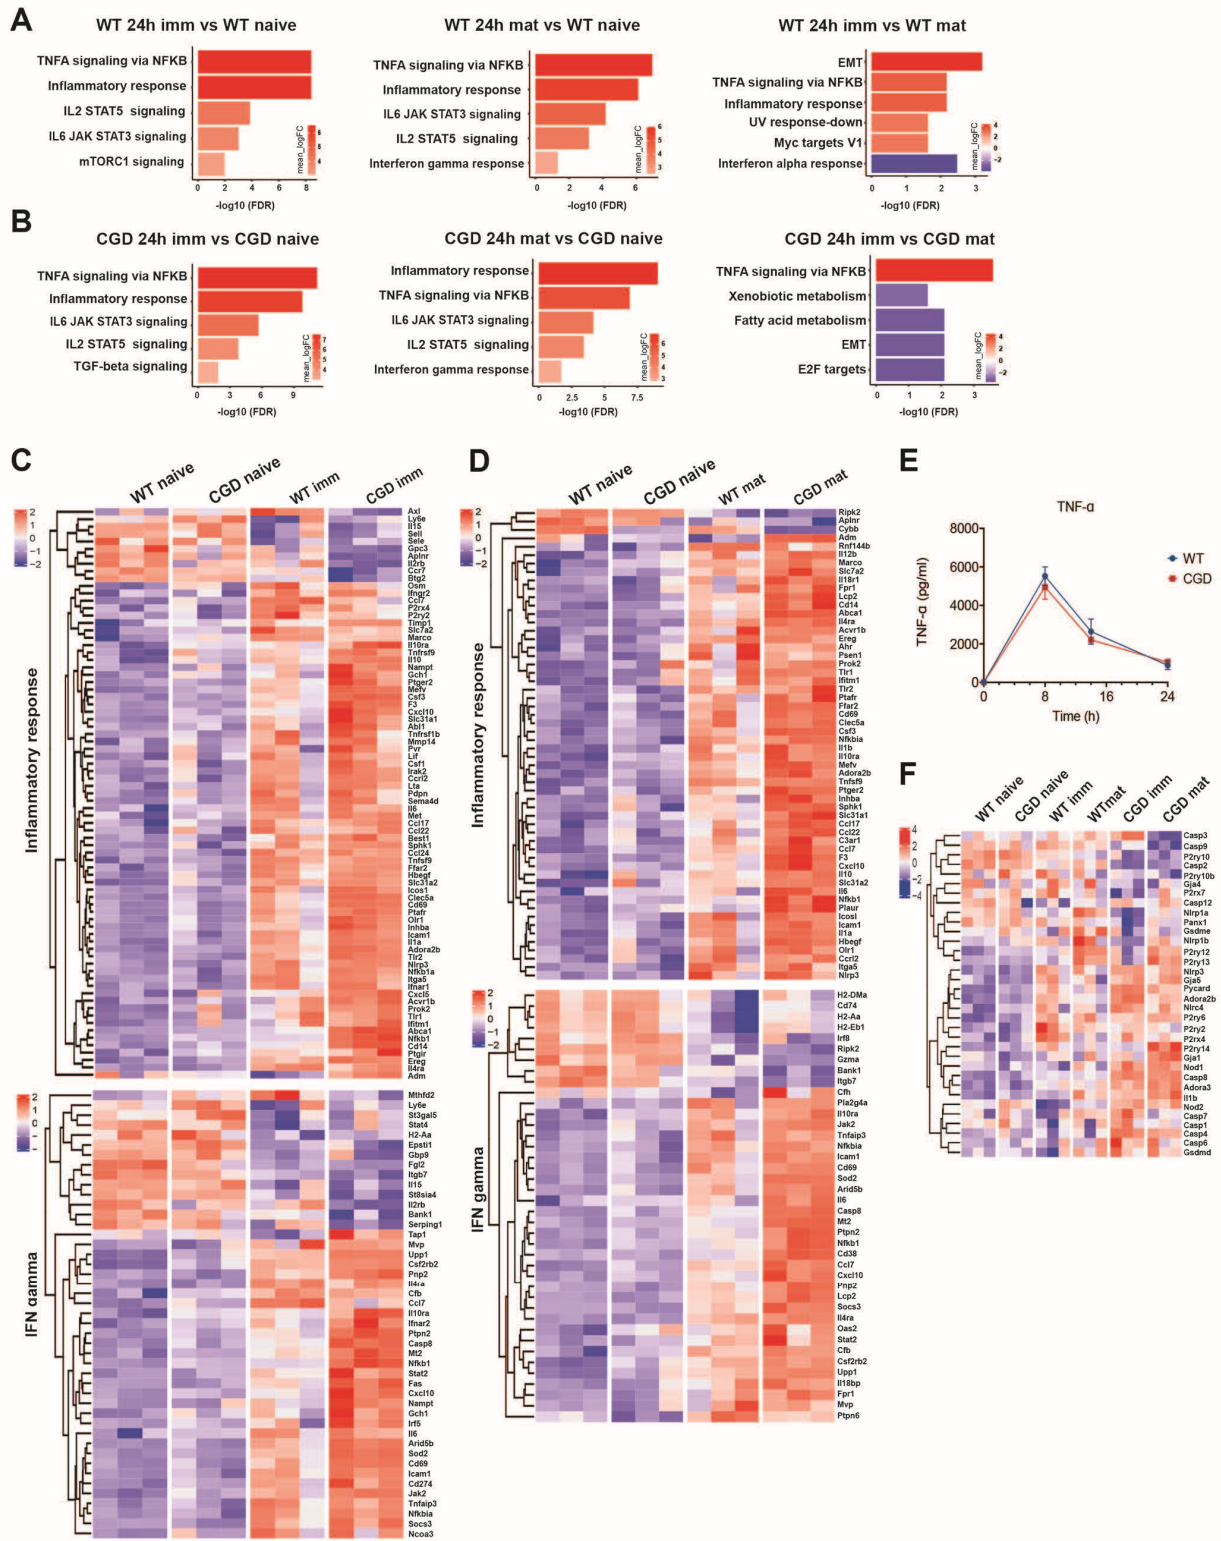



**Fig. S6.** (A-B) Hallmark gene sets analyzed using GAGE between the indicated different comparison pairs. (C) Heat map of genes (limma/voom-normalized) that are expressed differentially between WT naive neutrophils and WT immature neutrophils, CGD naive neutrophils and CGD immature neutrophils in the lung from “Hallmark” pathways analyzed using GAGE. (D) Heat map of genes (limma/voom-normalized) that are expressed differentially between WT naive neutrophils and WT mature neutrophils, CGD naive neutrophils and CGD mature neutrophils in the lung from Hallmark gene sets analyzed using GAGE. (E) TNF- $\alpha$  level in 1st ml BAL of zymosan challenged mice were determined by ELISA.  $n \geq 2$  in each group from more than 2 independent experiments. Data are means  $\pm$  standard error of the mean. (F) Expression of genes (limma/voom-normalized) related to IL-1 $\beta$  production.

**Supplementary Table 1.****Gene list of the 500 most differentially expressed genes generated between CGD and WT immature neutrophils (corresponding to Figure 7E).**

Genes are ordered by hierarchical clustering, in the same order as in Figure. 7E. Gene ID, gene name, log Fold change (FC) and Adjusted P Value are provided. Log FC > 0 means up-regulated genes in CGD immature PMNs compared to WT immature PMNs; Log FC < 0 means down-regulated genes in CGD immature PMNs compared to WT immature PMNs.

| Number | Gene ID            | Gene name | CGD imm PMN VS WT imm PMN logFC | CGD imm PMN VS WT imm PMN Adj P.Value |
|--------|--------------------|-----------|---------------------------------|---------------------------------------|
| 1      | ENSMUSG00000040430 | Pitpnc1   | 0.8510                          | 1.66E-04                              |
| 2      | ENSMUSG00000026249 | Serpine2  | 2.2750                          | 6.15E-05                              |
| 3      | ENSMUSG00000058056 | Palld     | 2.1392                          | 1.03E-04                              |
| 4      | ENSMUSG00000068040 | Tm9sf4    | 1.2565                          | 2.85E-04                              |
| 5      | ENSMUSG00000017132 | Cyth1     | 1.3082                          | 4.84E-05                              |
| 6      | ENSMUSG00000002257 | Def6      | 1.1189                          | 1.22E-04                              |
| 7      | ENSMUSG00000055652 | Klhl25    | 1.1784                          | 2.38E-05                              |
| 8      | ENSMUSG00000028412 | Slc44a1   | 1.8307                          | 8.65E-06                              |
| 9      | ENSMUSG00000037822 | Smim14    | 0.8533                          | 2.36E-04                              |
| 10     | ENSMUSG00000005533 | Igf1r     | 1.2086                          | 1.22E-04                              |
| 11     | ENSMUSG00000029723 | Tsc22d4   | 1.2735                          | 4.88E-05                              |
| 12     | ENSMUSG00000030788 | Rnf141    | 1.0958                          | 3.50E-05                              |
| 13     | ENSMUSG00000031622 | Sin3b     | 1.2255                          | 9.57E-06                              |
| 14     | ENSMUSG00000024277 | Mapre2    | 1.6168                          | 7.26E-07                              |
| 15     | ENSMUSG00000031585 | Gtf2e2    | 0.9649                          | 3.40E-05                              |
| 16     | ENSMUSG00000006058 | Snf8      | 1.0000                          | 2.99E-05                              |
| 17     | ENSMUSG00000020029 | Nudt4     | 1.3121                          | 8.31E-06                              |
| 18     | ENSMUSG00000081833 | Gm13669   | 1.4963                          | 1.79E-04                              |
| 19     | ENSMUSG00000033192 | Lpcat2    | 1.0099                          | 4.97E-05                              |
| 20     | ENSMUSG00000055994 | Nod2      | 0.9277                          | 2.19E-05                              |
| 21     | ENSMUSG00000070305 | Mpzl3     | 1.9194                          | 5.80E-05                              |
| 22     | ENSMUSG00000024055 | Cyp4f13   | 1.3238                          | 3.88E-05                              |
| 23     | ENSMUSG00000033885 | Pxk       | 1.3103                          | 7.13E-05                              |
| 24     | ENSMUSG00000029338 | Antxr2    | 1.8421                          | 1.72E-06                              |
| 25     | ENSMUSG00000063406 | Tmed5     | 1.5012                          | 2.55E-05                              |
| 26     | ENSMUSG00000027429 | Sec23b    | 1.2988                          | 2.85E-06                              |
| 27     | ENSMUSG00000024474 | Ik        | 1.1109                          | 1.22E-05                              |
| 28     | ENSMUSG00000064215 | Ifi27     | 1.1475                          | 2.96E-04                              |
| 29     | ENSMUSG00000029322 | Plac8     | 1.8635                          | 3.77E-06                              |
| 30     | ENSMUSG00000021982 | Cdad1     | 1.4395                          | 1.17E-04                              |
| 31     | ENSMUSG00000066441 | Rdh11     | 1.1504                          | 2.66E-04                              |
| 32     | ENSMUSG00000030056 | Isy1      | 1.4330                          | 8.50E-05                              |

|    |                    |               |        |          |
|----|--------------------|---------------|--------|----------|
| 33 | ENSMUSG00000067613 | Krt83         | 2.3045 | 2.25E-04 |
| 34 | ENSMUSG00000052139 | Babam2        | 1.3784 | 3.40E-05 |
| 35 | ENSMUSG00000049653 | Spatc1        | 1.6957 | 2.42E-05 |
| 36 | ENSMUSG00000092920 | Mirt2         | 1.5579 | 5.51E-05 |
| 37 | ENSMUSG00000054905 | Stfa3         | 3.9392 | 4.85E-05 |
| 38 | ENSMUSG00000024082 | Ndufaf7       | 1.5626 | 3.79E-05 |
| 39 | ENSMUSG00000059316 | Slc27a4       | 1.5390 | 1.03E-04 |
| 40 | ENSMUSG00000026696 | Vamp4         | 1.1772 | 2.24E-05 |
| 41 | ENSMUSG00000094733 | Gm5416        | 1.9981 | 8.32E-05 |
| 42 | ENSMUSG00000024953 | Prdx5         | 1.8274 | 1.06E-05 |
| 43 | ENSMUSG00000019795 | Pcmt1         | 1.1607 | 2.29E-05 |
| 44 | ENSMUSG00000021576 | Pdcd6         | 1.2525 | 1.66E-04 |
| 45 | ENSMUSG00000037958 | Nsrp1         | 1.0530 | 3.74E-05 |
| 46 | ENSMUSG00000055447 | Cd47          | 1.4749 | 1.22E-06 |
| 47 | ENSMUSG00000063889 | Crem          | 2.2627 | 1.43E-07 |
| 48 | ENSMUSG00000038467 | Chmp4b        | 1.2202 | 8.39E-05 |
| 49 | ENSMUSG00000026271 | Gpr35         | 1.5706 | 2.71E-06 |
| 50 | ENSMUSG00000009633 | G0s2          | 1.3618 | 7.38E-05 |
| 51 | ENSMUSG00000074417 | Gm14548       | 1.6020 | 5.64E-05 |
| 52 | ENSMUSG00000074417 | Gm14548       | 1.6020 | 5.64E-05 |
| 53 | ENSMUSG00000074417 | Gm14548       | 1.6020 | 5.64E-05 |
| 54 | ENSMUSG00000031825 | Crispld2      | 2.2653 | 7.71E-05 |
| 55 | ENSMUSG00000026068 | Il18rap       | 1.5528 | 1.56E-04 |
| 56 | ENSMUSG00000078122 | F630028O10Rik | 1.4824 | 5.93E-06 |
| 57 | ENSMUSG00000059089 | Fcgr4         | 1.2136 | 2.67E-05 |
| 58 | ENSMUSG00000022831 | Hcls1         | 1.1464 | 7.83E-05 |
| 59 | ENSMUSG00000085245 | Gm11713       | 2.8661 | 1.07E-04 |
| 60 | ENSMUSG00000040451 | Sgms1         | 1.3563 | 1.73E-05 |
| 61 | ENSMUSG00000030472 | Ceacam18      | 1.9769 | 1.77E-05 |
| 62 | ENSMUSG00000049988 | Lrrc25        | 1.0231 | 1.25E-04 |
| 63 | ENSMUSG00000030474 | Siglece       | 1.4460 | 3.35E-05 |
| 64 | ENSMUSG00000028159 | Dapp1         | 0.8773 | 2.25E-04 |
| 65 | ENSMUSG00000018932 | Map2k3        | 0.8638 | 1.32E-04 |
| 66 | ENSMUSG00000055866 | Per2          | 1.6433 | 1.31E-04 |
| 67 | ENSMUSG00000021555 | Naa35         | 0.8559 | 1.18E-04 |
| 68 | ENSMUSG00000035596 | Mboat7        | 1.2505 | 9.57E-06 |
| 69 | ENSMUSG00000079597 | Gm5483        | 2.6932 | 1.31E-05 |
| 70 | ENSMUSG00000095620 | 2010005H15Rik | 2.6624 | 2.67E-05 |
| 71 | ENSMUSG00000021365 | Nedd9         | 1.8210 | 5.19E-07 |
| 72 | ENSMUSG00000006850 | Tmco6         | 1.8659 | 7.22E-06 |
| 73 | ENSMUSG00000020248 | Nfyb          | 1.2840 | 1.42E-05 |
| 74 | ENSMUSG00000048120 | Entpd1        | 1.3312 | 9.72E-06 |
| 75 | ENSMUSG00000030747 | Dgat2         | 2.0535 | 2.01E-05 |

|     |                     |               |        |          |
|-----|---------------------|---------------|--------|----------|
| 76  | ENSMUSG00000027360  | Hdc           | 1.8667 | 2.18E-05 |
| 77  | ENSMUSG00000092060  | Bend4         | 2.2837 | 1.25E-04 |
| 78  | ENSMUSG00000020687  | Cdc27         | 1.4752 | 1.75E-04 |
| 79  | ENSMUSG00000055805  | Fmn1          | 0.9203 | 3.01E-04 |
| 80  | ENSMUSG00000019986  | Ahi1          | 1.3600 | 8.88E-05 |
| 81  | ENSMUSG00000022280  | Rnf19a        | 1.4570 | 3.77E-06 |
| 82  | ENSMUSG00000019920  | Lims1         | 1.4234 | 6.86E-06 |
| 83  | ENSMUSG00000021796  | Bmpr1a        | 1.6357 | 3.28E-05 |
| 84  | ENSMUSG00000079499  | 6530402F18Rik | 1.4332 | 2.19E-05 |
| 85  | ENSMUSG00000031134  | Rbmx          | 0.9303 | 4.69E-05 |
| 86  | ENSMUSG00000063268  | Parp10        | 1.7731 | 1.58E-04 |
| 87  | ENSMUSG00000039236  | lsg20         | 1.4247 | 2.57E-04 |
| 88  | ENSMUSG00000078853  | lgtp          | 2.4791 | 1.61E-04 |
| 89  | ENSMUSG00000078920  | Ifi47         | 3.7197 | 9.28E-06 |
| 90  | ENSMUSG00000046879  | Irgm1         | 2.7582 | 3.38E-05 |
| 91  | ENSMUSG00000082292  | Gm12250       | 4.1326 | 1.85E-05 |
| 92  | ENSMUSG00000037321  | Tap1          | 1.9527 | 1.40E-04 |
| 93  | ENSMUSG00000074151  | Nlrc5         | 1.6822 | 8.50E-05 |
| 94  | ENSMUSG00000090709  | Gm17173       | 2.8646 | 2.72E-05 |
| 95  | ENSMUSG00000062991  | Nrg1          | 2.8024 | 3.26E-05 |
| 96  | ENSMUSG00000037012  | Hk1           | 1.3088 | 4.85E-05 |
| 97  | ENSMUSG00000079197  | Psme2         | 1.4261 | 2.30E-04 |
| 98  | ENSMUSG00000024737  | Slc15a3       | 1.4982 | 5.86E-06 |
| 99  | ENSMUSG000000101279 | Gm18342       | 2.4477 | 8.56E-05 |
| 100 | ENSMUSG00000089844  | A530032D15Rik | 2.6968 | 6.37E-07 |
| 101 | ENSMUSG00000070031  | Sp140         | 2.2990 | 4.23E-07 |
| 102 | ENSMUSG00000021196  | Pfkp          | 2.3801 | 1.00E-08 |
| 103 | ENSMUSG00000021585  | Cast          | 1.8127 | 3.81E-07 |
| 104 | ENSMUSG00000007038  | Neu1          | 1.7295 | 4.85E-07 |
| 105 | ENSMUSG00000026519  | Tmem63a       | 2.0361 | 4.43E-08 |
| 106 | ENSMUSG00000052477  | C130026I21Rik | 2.7029 | 3.38E-05 |
| 107 | ENSMUSG00000072109  | A530040E14Rik | 2.7784 | 3.37E-07 |
| 108 | ENSMUSG00000070034  | Sp110         | 1.8607 | 1.16E-06 |
| 109 | ENSMUSG00000027366  | Sppl2a        | 0.7927 | 1.91E-04 |
| 110 | ENSMUSG00000025384  | Faap100       | 0.9361 | 8.09E-05 |
| 111 | ENSMUSG00000090136  | Gm10177       | 1.3213 | 1.93E-04 |
| 112 | ENSMUSG00000073987  | Ggh           | 1.0918 | 1.14E-04 |
| 113 | ENSMUSG00000009647  | Mcu           | 1.0584 | 4.18E-05 |
| 114 | ENSMUSG00000022978  | Mis18a        | 1.0501 | 1.56E-04 |
| 115 | ENSMUSG00000050931  | Sgms2         | 1.2555 | 4.76E-05 |
| 116 | ENSMUSG00000098967  | Gm27845       | 1.3739 | 2.06E-04 |
| 117 | ENSMUSG00000098088  | Gm26916       | 1.2759 | 2.68E-04 |
| 118 | ENSMUSG00000085335  | Gm13684       | 2.6924 | 4.23E-05 |

|     |                    |               |        |          |
|-----|--------------------|---------------|--------|----------|
| 119 | ENSMUSG00000026655 | Fam107b       | 1.2538 | 7.22E-06 |
| 120 | ENSMUSG00000038463 | Olfml2b       | 2.9473 | 1.80E-07 |
| 121 | ENSMUSG00000069170 | Adgrv1        | 3.8219 | 1.80E-05 |
| 122 | ENSMUSG00000046808 | Atp10d        | 2.5103 | 4.69E-07 |
| 123 | ENSMUSG00000035513 | Ntng2         | 1.6084 | 7.15E-05 |
| 124 | ENSMUSG00000073771 | Btbd19        | 1.1988 | 2.78E-04 |
| 125 | ENSMUSG00000040663 | Clcf1         | 2.5126 | 1.61E-04 |
| 126 | ENSMUSG00000041235 | Chd7          | 1.3795 | 4.97E-05 |
| 127 | ENSMUSG00000078485 | Plekhn1       | 3.6458 | 4.51E-06 |
| 128 | ENSMUSG00000078485 | Plekhn1       | 3.6458 | 4.51E-06 |
| 129 | ENSMUSG00000027091 | Zc3h15        | 0.8187 | 1.94E-04 |
| 130 | ENSMUSG00000003228 | Grk5          | 2.4921 | 4.23E-07 |
| 131 | ENSMUSG00000023827 | Agpat4        | 2.2848 | 2.79E-05 |
| 132 | ENSMUSG00000038608 | Dock10        | 2.4352 | 3.50E-05 |
| 133 | ENSMUSG00000085126 | Gm12589       | 2.7792 | 1.24E-05 |
| 134 | ENSMUSG00000097636 | Mirt1         | 0.9569 | 3.07E-04 |
| 135 | ENSMUSG00000040152 | Thbs1         | 1.9016 | 3.01E-04 |
| 136 | ENSMUSG00000006169 | Clint1        | 1.1413 | 8.09E-05 |
| 137 | ENSMUSG00000023809 | Rps6ka2       | 2.1616 | 2.34E-05 |
| 138 | ENSMUSG00000079442 | St6galnac4    | 1.1564 | 2.36E-04 |
| 139 | ENSMUSG00000026470 | Stx6          | 1.6775 | 3.21E-06 |
| 140 | ENSMUSG00000040669 | Phc1          | 1.9979 | 3.26E-05 |
| 141 | ENSMUSG00000028716 | Pdzk1ip1      | 3.4307 | 1.85E-04 |
| 142 | ENSMUSG00000052512 | Nav2          | 1.8364 | 5.64E-05 |
| 143 | ENSMUSG00000029715 | Pop7          | 1.1696 | 1.61E-04 |
| 144 | ENSMUSG00000000827 | Tpd52l2       | 1.0440 | 4.86E-05 |
| 145 | ENSMUSG00000039208 | Metrn1        | 1.4020 | 1.17E-05 |
| 146 | ENSMUSG00000034220 | Gpc1          | 1.8550 | 4.85E-07 |
| 147 | ENSMUSG00000039844 | Rapgef1       | 1.0648 | 1.25E-04 |
| 148 | ENSMUSG00000051413 | Plagl2        | 1.7014 | 5.39E-06 |
| 149 | ENSMUSG00000063870 | Chd4          | 0.8733 | 7.68E-05 |
| 150 | ENSMUSG00000090394 | 4930523C07Rik | 1.2743 | 9.57E-06 |
| 151 | ENSMUSG00000048307 | Ankrd46       | 1.3201 | 5.75E-06 |
| 152 | ENSMUSG00000023067 | Cdkn1a        | 1.3094 | 1.38E-06 |
| 153 | ENSMUSG00000078812 | Eif5a         | 1.3888 | 2.68E-05 |
| 154 | ENSMUSG00000002845 | Tmem39a       | 1.2050 | 2.83E-04 |
| 155 | ENSMUSG00000031246 | Sh3bgr1       | 0.9303 | 2.13E-04 |
| 156 | ENSMUSG00000019437 | Tlcd1         | 1.9086 | 2.71E-04 |
| 157 | ENSMUSG00000035227 | Spcs2         | 0.9468 | 8.14E-05 |
| 158 | ENSMUSG00000030082 | Sec61a1       | 0.9115 | 9.51E-05 |
| 159 | ENSMUSG00000017405 | Nek8          | 2.2174 | 1.96E-05 |
| 160 | ENSMUSG00000041084 | Ostc          | 1.2130 | 2.55E-05 |
| 161 | ENSMUSG00000039217 | I118          | 1.7053 | 1.61E-04 |



|     |                    |               |        |          |
|-----|--------------------|---------------|--------|----------|
| 162 | ENSMUSG00000022686 | B3gnt5        | 1.7613 | 2.75E-05 |
| 163 | ENSMUSG00000030659 | Nucb2         | 1.8636 | 9.57E-06 |
| 164 | ENSMUSG00000029319 | Coq2          | 2.2298 | 8.31E-06 |
| 165 | ENSMUSG00000003134 | Tbc1d8        | 1.5096 | 4.74E-05 |
| 166 | ENSMUSG00000034135 | Sik3          | 1.7563 | 2.67E-05 |
| 167 | ENSMUSG00000025314 | Ptprj         | 1.7139 | 1.57E-05 |
| 168 | ENSMUSG00000045349 | Sh2d5         | 4.6405 | 9.66E-07 |
| 169 | ENSMUSG00000028792 | Ak2           | 1.1683 | 1.56E-04 |
| 170 | ENSMUSG00000022974 | Paxbp1        | 1.3446 | 1.54E-04 |
| 171 | ENSMUSG00000024220 | Zfp523        | 1.9128 | 8.35E-05 |
| 172 | ENSMUSG00000017386 | Traf4         | 2.1506 | 9.41E-05 |
| 173 | ENSMUSG00000046573 | Lym4          | 2.1405 | 1.25E-05 |
| 174 | ENSMUSG00000042831 | Alkbh6        | 1.6332 | 3.65E-06 |
| 175 | ENSMUSG00000022951 | Rcan1         | 1.6841 | 1.04E-04 |
| 176 | ENSMUSG00000042111 | Ccdc115       | 1.3728 | 8.35E-05 |
| 177 | ENSMUSG00000046731 | Kctd11        | 1.3486 | 9.63E-05 |
| 178 | ENSMUSG00000042992 | Borcs5        | 1.2366 | 2.12E-04 |
| 179 | ENSMUSG00000062421 | Arf2          | 1.3545 | 8.25E-05 |
| 180 | ENSMUSG00000034187 | Nsf           | 1.3825 | 2.68E-05 |
| 181 | ENSMUSG00000031304 | Il2rg         | 1.7614 | 4.12E-06 |
| 182 | ENSMUSG00000031278 | Acsl4         | 2.0376 | 8.45E-07 |
| 183 | ENSMUSG00000021367 | Edn1          | 3.3442 | 1.13E-06 |
| 184 | ENSMUSG00000026670 | Uap1          | 1.7376 | 1.15E-05 |
| 185 | ENSMUSG00000040274 | Cdk6          | 1.8915 | 6.93E-05 |
| 186 | ENSMUSG00000007458 | M6pr          | 1.5479 | 8.35E-05 |
| 187 | ENSMUSG00000031007 | Atp6ap2       | 1.2524 | 1.56E-04 |
| 188 | ENSMUSG00000020085 | Aifm2         | 1.6113 | 3.79E-05 |
| 189 | ENSMUSG00000003549 | Ercc1         | 1.3024 | 2.02E-04 |
| 190 | ENSMUSG00000020275 | Rel           | 1.0570 | 2.07E-04 |
| 191 | ENSMUSG00000024981 | Acsl5         | 1.1821 | 3.21E-05 |
| 192 | ENSMUSG00000030108 | Slc6a13       | 1.6375 | 3.00E-04 |
| 193 | ENSMUSG00000030060 | Hmces         | 1.3722 | 1.70E-04 |
| 194 | ENSMUSG00000060216 | Arrb2         | 1.4469 | 1.74E-05 |
| 195 | ENSMUSG00000019173 | Rab5c         | 1.1618 | 8.96E-05 |
| 196 | ENSMUSG00000097781 | 9330136K24Rik | 1.8468 | 2.05E-04 |
| 197 | ENSMUSG00000025757 | Hspa4l        | 2.2008 | 5.89E-07 |
| 198 | ENSMUSG00000051978 | Erich1        | 1.1414 | 1.91E-04 |
| 199 | ENSMUSG00000033721 | Vav3          | 0.9020 | 1.93E-04 |
| 200 | ENSMUSG00000024854 | Pold4         | 1.3800 | 3.75E-06 |
| 201 | ENSMUSG00000038855 | Itpkb         | 1.4302 | 4.12E-06 |
| 202 | ENSMUSG00000041231 | Ublcp1        | 1.0853 | 2.85E-04 |
| 203 | ENSMUSG00000027751 | Supt20        | 0.8793 | 1.13E-04 |
| 204 | ENSMUSG00000020225 | Tmbim4        | 0.7851 | 1.58E-04 |

|     |                    |               |        |          |
|-----|--------------------|---------------|--------|----------|
| 205 | ENSMUSG00000073643 | Wdfy1         | 1.1683 | 3.17E-04 |
| 206 | ENSMUSG00000029136 | Rbks          | 1.2343 | 1.24E-04 |
| 207 | ENSMUSG00000031176 | Dynlt3        | 1.1321 | 5.21E-05 |
| 208 | ENSMUSG0000001833  | 44811         | 1.3318 | 1.72E-06 |
| 209 | ENSMUSG00000073725 | Lmbrd1        | 1.0455 | 4.67E-05 |
| 210 | ENSMUSG00000074781 | Ube2n         | 0.8450 | 1.61E-04 |
| 211 | ENSMUSG00000040747 | Cd53          | 1.1669 | 5.85E-05 |
| 212 | ENSMUSG00000026914 | Psm14         | 1.1911 | 6.89E-05 |
| 213 | ENSMUSG00000041355 | Ssr2          | 1.1048 | 6.80E-05 |
| 214 | ENSMUSG00000016194 | Hsd11b1       | 1.5003 | 4.10E-05 |
| 215 | ENSMUSG00000059119 | Nap1l4        | 1.2910 | 1.65E-05 |
| 216 | ENSMUSG00000055639 | Dach1         | 2.4894 | 4.69E-05 |
| 217 | ENSMUSG00000078974 | Sec61g        | 1.2934 | 5.39E-06 |
| 218 | ENSMUSG00000089683 | 4930570N18Rik | 2.9915 | 4.97E-05 |
| 219 | ENSMUSG00000027828 | Ssr3          | 1.0674 | 2.01E-05 |
| 220 | ENSMUSG00000029649 | Pomp          | 1.7350 | 6.75E-07 |
| 221 | ENSMUSG00000006050 | Sra1          | 1.4147 | 8.48E-06 |
| 222 | ENSMUSG00000020077 | Srgn          | 1.3448 | 1.80E-05 |
| 223 | ENSMUSG00000027940 | Tpm3          | 1.0540 | 8.93E-05 |
| 224 | ENSMUSG00000052270 | Fpr2          | 2.3389 | 3.08E-06 |
| 225 | ENSMUSG00000038172 | Ttc39b        | 1.4174 | 3.35E-05 |
| 226 | ENSMUSG00000026095 | Asnsd1        | 1.7628 | 1.70E-04 |
| 227 | ENSMUSG00000045551 | Fpr1          | 2.0405 | 8.50E-05 |
| 228 | ENSMUSG00000019868 | Vta1          | 0.8657 | 2.87E-04 |
| 229 | ENSMUSG00000051439 | Cd14          | 1.6505 | 4.73E-06 |
| 230 | ENSMUSG00000038527 | C1rl          | 2.1484 | 7.26E-07 |
| 231 | ENSMUSG00000030922 | Lym1          | 1.1393 | 1.17E-04 |
| 232 | ENSMUSG00000053846 | Lipg          | 1.8291 | 2.54E-05 |
| 233 | ENSMUSG00000022026 | Olfm4         | 2.1315 | 4.67E-05 |
| 234 | ENSMUSG00000060470 | Adrg3         | 1.6026 | 2.38E-05 |
| 235 | ENSMUSG00000027333 | Smox          | 1.6584 | 2.38E-05 |
| 236 | ENSMUSG00000021557 | Agtpbp1       | 1.6200 | 1.49E-05 |
| 237 | ENSMUSG00000064147 | Rab44         | 1.1557 | 2.25E-05 |
| 238 | ENSMUSG00000027776 | Il12a         | 3.2751 | 1.00E-08 |
| 239 | ENSMUSG00000054855 | Rnd1          | 2.0343 | 6.69E-07 |
| 240 | ENSMUSG00000097113 | Gm19705       | 1.8330 | 2.96E-05 |
| 241 | ENSMUSG00000023892 | Zfp51         | 1.0148 | 1.22E-04 |
| 242 | ENSMUSG00000050029 | Rap2c         | 0.9288 | 8.45E-05 |
| 243 | ENSMUSG00000032602 | Slc25a20      | 1.5760 | 2.54E-04 |
| 244 | ENSMUSG00000066363 | Serpina3f     | 2.8380 | 1.66E-04 |
| 245 | ENSMUSG00000037965 | Zc3h7a        | 1.2609 | 9.72E-06 |
| 246 | ENSMUSG00000075122 | Cd80          | 1.2943 | 2.43E-06 |
| 247 | ENSMUSG00000018899 | Irf1          | 1.9823 | 8.48E-06 |

|     |                    |          |        |          |
|-----|--------------------|----------|--------|----------|
| 248 | ENSMUSG00000034855 | Cxcl10   | 3.8707 | 2.88E-06 |
| 249 | ENSMUSG00000046223 | Plaur    | 1.1505 | 1.78E-05 |
| 250 | ENSMUSG00000007589 | Tinf2    | 2.4399 | 5.57E-06 |
| 251 | ENSMUSG00000057440 | Mpp7     | 1.9773 | 1.42E-06 |
| 252 | ENSMUSG00000029104 | Htt      | 2.0767 | 2.19E-05 |
| 253 | ENSMUSG00000074071 | Fam169b  | 4.3966 | 4.66E-08 |
| 254 | ENSMUSG00000048787 | Dcun1d3  | 1.4250 | 8.48E-06 |
| 255 | ENSMUSG00000024222 | Fkbp5    | 1.7449 | 5.86E-05 |
| 256 | ENSMUSG00000040943 | Tet2     | 1.4763 | 2.38E-05 |
| 257 | ENSMUSG00000030203 | Dusp16   | 1.5205 | 1.80E-06 |
| 258 | ENSMUSG00000015243 | Abca1    | 2.4312 | 8.01E-08 |
| 259 | ENSMUSG00000028163 | Nfkb1    | 1.5622 | 5.19E-07 |
| 260 | ENSMUSG00000029084 | Cd38     | 3.6195 | 1.00E-08 |
| 261 | ENSMUSG00000015850 | Adamtsl4 | 2.1024 | 5.56E-07 |
| 262 | ENSMUSG00000028108 | Ecm1     | 2.8335 | 1.92E-08 |
| 263 | ENSMUSG00000098708 | Gm27252  | 3.5984 | 5.54E-07 |
| 264 | ENSMUSG00000026096 | Osgepl1  | 2.2155 | 3.19E-07 |
| 265 | ENSMUSG00000025130 | P4hb     | 2.1940 | 1.01E-08 |
| 266 | ENSMUSG00000006736 | Tspan31  | 0.9060 | 2.02E-04 |
| 267 | ENSMUSG00000022221 | Ripk3    | 1.3748 | 9.72E-06 |
| 268 | ENSMUSG00000040809 | Chil3    | 2.9305 | 3.35E-05 |
| 269 | ENSMUSG00000063779 | Chil4    | 2.7987 | 9.37E-06 |
| 270 | ENSMUSG00000057280 | Musk     | 3.8976 | 1.37E-04 |
| 271 | ENSMUSG00000002658 | Gtf2f1   | 1.2727 | 7.15E-06 |
| 272 | ENSMUSG00000023087 | Noct     | 1.6912 | 2.18E-06 |
| 273 | ENSMUSG00000002233 | Rhoc     | 1.7596 | 1.01E-06 |
| 274 | ENSMUSG00000067931 | Zfp948   | 2.8143 | 3.86E-06 |
| 275 | ENSMUSG00000027777 | Schip1   | 2.7223 | 6.99E-07 |
| 276 | ENSMUSG00000026074 | Map4k4   | 1.3942 | 1.00E-04 |
| 277 | ENSMUSG00000079652 | Fam71f2  | 2.5314 | 1.65E-05 |
| 278 | ENSMUSG00000029304 | Spp1     | 3.7934 | 2.54E-05 |
| 279 | ENSMUSG00000018882 | Mrpl45   | 1.2024 | 1.59E-04 |
| 280 | ENSMUSG00000064145 | Arih2    | 1.0463 | 1.55E-04 |
| 281 | ENSMUSG00000048327 | Ckap2l   | 1.3793 | 2.85E-04 |
| 282 | ENSMUSG00000040374 | Pex2     | 1.0277 | 1.61E-04 |
| 283 | ENSMUSG00000001473 | Tubb6    | 2.2595 | 9.28E-06 |
| 284 | ENSMUSG00000024539 | Ptpn2    | 0.8766 | 2.07E-04 |
| 285 | ENSMUSG00000029552 | Tes      | 2.2789 | 5.56E-07 |
| 286 | ENSMUSG00000031245 | Hmgn5    | 1.5858 | 1.31E-04 |
| 287 | ENSMUSG00000020644 | Id2      | 1.5054 | 1.33E-04 |
| 288 | ENSMUSG00000002699 | Lcp2     | 1.0280 | 5.86E-06 |
| 289 | ENSMUSG00000031901 | Dus2     | 2.0591 | 7.48E-06 |
| 290 | ENSMUSG00000029204 | Rhoh     | 2.7543 | 1.00E-08 |

|     |                     |               |        |          |
|-----|---------------------|---------------|--------|----------|
| 291 | ENSMUSG00000031762  | Mt2           | 2.2518 | 6.54E-06 |
| 292 | ENSMUSG00000020484  | Xbp1          | 1.2538 | 2.50E-05 |
| 293 | ENSMUSG00000030595  | Nfkbib        | 1.2056 | 5.94E-05 |
| 294 | ENSMUSG00000038067  | Csf3          | 2.3685 | 2.39E-06 |
| 295 | ENSMUSG00000006818  | Sod2          | 1.2896 | 1.78E-04 |
| 296 | ENSMUSG00000021668  | Polk          | 1.6298 | 8.50E-05 |
| 297 | ENSMUSG00000026984  | Il1f6         | 3.5503 | 1.15E-04 |
| 298 | ENSMUSG00000094845  | Tmem95        | 2.2391 | 8.00E-05 |
| 299 | ENSMUSG00000020205  | Phlda1        | 1.2193 | 1.22E-04 |
| 300 | ENSMUSG00000026097  | Ormdl1        | 1.4987 | 1.19E-05 |
| 301 | ENSMUSG00000002847  | Pla1a         | 2.1596 | 4.23E-05 |
| 302 | ENSMUSG00000001999  | Blvra         | 1.5655 | 6.96E-05 |
| 303 | ENSMUSG00000029484  | Anxa3         | 1.2123 | 1.56E-04 |
| 304 | ENSMUSG00000026029  | Casp8         | 1.6041 | 5.26E-06 |
| 305 | ENSMUSG00000029379  | Cxcl3         | 3.1600 | 4.43E-08 |
| 306 | ENSMUSG00000028128  | F3            | 1.5989 | 1.51E-05 |
| 307 | ENSMUSG00000013846  | St3gal1       | 1.4984 | 3.50E-05 |
| 308 | ENSMUSG00000026558  | Uck2          | 2.1082 | 4.97E-05 |
| 309 | ENSMUSG00000058022  | Adtrp         | 1.8497 | 2.36E-04 |
| 310 | ENSMUSG00000022534  | Mefv          | 1.2502 | 5.94E-05 |
| 311 | ENSMUSG00000031506  | Ptpn7         | 1.4176 | 9.17E-05 |
| 312 | ENSMUSG00000000628  | Hk2           | 1.0309 | 2.70E-04 |
| 313 | ENSMUSG000000087066 | Gm15518       | 3.0447 | 2.00E-04 |
| 314 | ENSMUSG00000079037  | Prnp          | 2.5228 | 3.65E-06 |
| 315 | ENSMUSG00000021871  | Gm49342       | 0.9152 | 1.53E-04 |
| 316 | ENSMUSG00000043008  | Klhl6         | 2.2070 | 2.55E-05 |
| 317 | ENSMUSG00000024235  | Map3k8        | 0.8677 | 2.11E-04 |
| 318 | ENSMUSG00000043421  | Hilpda        | 1.7581 | 4.67E-05 |
| 319 | ENSMUSG00000045664  | Cdc42ep2      | 1.0624 | 3.15E-05 |
| 320 | ENSMUSG00000071180  | Smim15        | 0.8665 | 1.93E-04 |
| 321 | ENSMUSG00000030469  | Zfp719        | 1.0797 | 2.23E-05 |
| 322 | ENSMUSG00000072620  | Sifn2         | 0.9963 | 1.70E-05 |
| 323 | ENSMUSG00000003206  | Ebi3          | 1.1838 | 6.93E-05 |
| 324 | ENSMUSG00000020451  | Limk2         | 0.9760 | 2.01E-04 |
| 325 | ENSMUSG00000040822  | 1700123O20Rik | 1.0248 | 7.21E-05 |
| 326 | ENSMUSG00000096140  | Ankrd66       | 2.3706 | 6.75E-06 |
| 327 | ENSMUSG00000069873  | 4930438A08Rik | 2.8284 | 8.65E-06 |
| 328 | ENSMUSG00000080316  | Spaca6        | 1.6544 | 2.85E-04 |
| 329 | ENSMUSG00000033066  | Gas7          | 1.1991 | 1.22E-04 |
| 330 | ENSMUSG00000039934  | Gsap          | 0.9597 | 2.03E-04 |
| 331 | ENSMUSG00000022102  | Dok2          | 1.9305 | 4.22E-05 |
| 332 | ENSMUSG00000018500  | Adora2b       | 2.0856 | 8.93E-05 |
| 333 | ENSMUSG00000026031  | Cflar         | 1.1802 | 1.52E-04 |

|     |                    |               |         |          |
|-----|--------------------|---------------|---------|----------|
| 334 | ENSMUSG00000021895 | Arhgef3       | 0.9044  | 2.25E-04 |
| 335 | ENSMUSG00000027381 | Bcl2l11       | 1.1343  | 4.97E-05 |
| 336 | ENSMUSG00000037759 | Ptger2        | 1.1457  | 3.11E-04 |
| 337 | ENSMUSG0000003847  | Nfat5         | 1.0715  | 1.45E-04 |
| 338 | ENSMUSG00000020227 | Irak3         | 2.5264  | 1.01E-08 |
| 339 | ENSMUSG00000033499 | Larp4b        | 1.4814  | 1.19E-05 |
| 340 | ENSMUSG00000031781 | Ciapin1       | 1.5719  | 1.16E-06 |
| 341 | ENSMUSG00000092526 | Gm17907       | 2.4975  | 2.50E-05 |
| 342 | ENSMUSG00000051341 | Zfp52         | 2.1590  | 5.08E-06 |
| 343 | ENSMUSG00000044719 | E230025N22Rik | 3.8868  | 5.99E-06 |
| 344 | ENSMUSG00000030447 | Cyfip1        | 2.1082  | 3.13E-07 |
| 345 | ENSMUSG00000079477 | Rab7          | 1.0887  | 4.97E-05 |
| 346 | ENSMUSG00000019210 | Atp6v1e1      | 1.0638  | 4.68E-05 |
| 347 | ENSMUSG00000053012 | Krcc1         | 0.9755  | 2.13E-05 |
| 348 | ENSMUSG00000094870 | Zfp131        | 1.0834  | 1.55E-04 |
| 349 | ENSMUSG00000021699 | Pde4d         | 1.5536  | 4.73E-06 |
| 350 | ENSMUSG00000024778 | Fas           | 1.0873  | 2.38E-05 |
| 351 | ENSMUSG00000026177 | Slc11a1       | 1.2763  | 1.16E-06 |
| 352 | ENSMUSG00000005615 | Pcyt1a        | -0.9281 | 1.33E-04 |
| 353 | ENSMUSG00000027698 | Nceh1         | -1.9551 | 1.03E-04 |
| 354 | ENSMUSG00000087141 | Plcx2         | -2.6109 | 2.14E-05 |
| 355 | ENSMUSG00000073700 | Klhl21        | -2.3086 | 7.71E-05 |
| 356 | ENSMUSG00000030161 | Gabarapl1     | -1.2949 | 1.32E-04 |
| 357 | ENSMUSG00000028378 | Ptgr1         | -2.4777 | 4.67E-05 |
| 358 | ENSMUSG00000094530 | Gm21399       | -2.7834 | 1.11E-06 |
| 359 | ENSMUSG00000028691 | Prdx1         | -2.8073 | 1.00E-08 |
| 360 | ENSMUSG00000048164 | Gm7204        | -2.8353 | 2.19E-05 |
| 361 | ENSMUSG00000005413 | Hmox1         | -1.5139 | 8.14E-05 |
| 362 | ENSMUSG00000028124 | Gclm          | -2.3165 | 2.54E-05 |
| 363 | ENSMUSG00000003849 | Nqo1          | -2.8906 | 3.21E-06 |
| 364 | ENSMUSG00000074063 | Osgin1        | -1.4111 | 4.69E-05 |
| 365 | ENSMUSG00000025591 | Tma16         | -2.4073 | 1.08E-04 |
| 366 | ENSMUSG00000004099 | Dnmt1         | -1.9736 | 2.04E-04 |
| 367 | ENSMUSG00000038508 | Gdf15         | -3.6870 | 8.35E-05 |
| 368 | ENSMUSG00000042870 | Tom1          | -0.9438 | 2.85E-04 |
| 369 | ENSMUSG00000049103 | Ccr2          | -1.8920 | 2.70E-04 |
| 370 | ENSMUSG00000005667 | Mthfd2        | -1.1792 | 2.55E-04 |
| 371 | ENSMUSG00000068220 | Lgals1        | -1.4796 | 7.45E-05 |
| 372 | ENSMUSG00000040552 | C3ar1         | -1.7091 | 3.25E-04 |
| 373 | ENSMUSG00000019838 | Slc16a10      | -1.2940 | 2.26E-04 |
| 374 | ENSMUSG00000051906 | Cd209f        | -3.8818 | 1.68E-04 |
| 375 | ENSMUSG00000025950 | Idh1          | -1.2209 | 3.14E-04 |
| 376 | ENSMUSG00000021775 | Nr1d2         | -1.9724 | 2.95E-04 |



|     |                    |          |         |          |
|-----|--------------------|----------|---------|----------|
| 377 | ENSMUSG00000086491 | Gm13291  | -6.7006 | 1.37E-04 |
| 378 | ENSMUSG00000033105 | Lss      | -2.2697 | 2.85E-04 |
| 379 | ENSMUSG00000006800 | Sulf2    | -1.7658 | 7.38E-05 |
| 380 | ENSMUSG00000022769 | Sdf2l1   | -2.1207 | 8.00E-05 |
| 381 | ENSMUSG00000021190 | Lgmn     | -1.5640 | 2.01E-04 |
| 382 | ENSMUSG00000024397 | Aif1     | -1.6017 | 2.88E-04 |
| 383 | ENSMUSG00000029416 | Slc15a4  | -1.6552 | 3.16E-04 |
| 384 | ENSMUSG00000057137 | Tmem140  | -1.6655 | 2.66E-04 |
| 385 | ENSMUSG00000040713 | Creg1    | -2.5146 | 1.90E-07 |
| 386 | ENSMUSG00000040466 | Blvrb    | -2.7573 | 7.05E-08 |
| 387 | ENSMUSG00000023132 | Gzma     | -2.4369 | 2.85E-04 |
| 388 | ENSMUSG00000048249 | Crebrf   | -0.9926 | 4.97E-05 |
| 389 | ENSMUSG00000049091 | Sephs2   | -1.2698 | 3.34E-05 |
| 390 | ENSMUSG00000047412 | Zbtb44   | -1.3330 | 2.50E-05 |
| 391 | ENSMUSG00000021250 | Fos      | -1.0379 | 2.25E-04 |
| 392 | ENSMUSG00000026986 | Hnmt     | -0.8434 | 4.18E-05 |
| 393 | ENSMUSG00000054008 | Ndst1    | -0.8921 | 9.51E-05 |
| 394 | ENSMUSG00000026393 | Nek7     | -1.0325 | 2.36E-04 |
| 395 | ENSMUSG00000032841 | Prr5l    | -1.7286 | 2.89E-05 |
| 396 | ENSMUSG00000029863 | Casp2    | -1.1909 | 1.75E-04 |
| 397 | ENSMUSG00000031453 | Rasa3    | -1.4927 | 9.39E-06 |
| 398 | ENSMUSG00000037185 | Krt80    | -1.4975 | 1.11E-06 |
| 399 | ENSMUSG00000028861 | Mrps15   | -1.1872 | 2.19E-05 |
| 400 | ENSMUSG00000090665 | Gad1-ps  | -1.4841 | 2.33E-06 |
| 401 | ENSMUSG00000050022 | Amz1     | -2.0357 | 1.11E-05 |
| 402 | ENSMUSG00000028550 | Atg4c    | -1.9227 | 2.29E-05 |
| 403 | ENSMUSG00000027009 | Itga4    | -1.6312 | 1.13E-05 |
| 404 | ENSMUSG00000032254 | Kif23    | -1.1854 | 1.87E-04 |
| 405 | ENSMUSG00000076617 | Ighm     | -1.6763 | 4.12E-06 |
| 406 | ENSMUSG00000023915 | Tnfrsf21 | -0.8445 | 2.20E-04 |
| 407 | ENSMUSG00000004105 | Angptl2  | -1.2248 | 1.92E-04 |
| 408 | ENSMUSG00000033910 | Gucy1a1  | -1.1284 | 2.65E-04 |
| 409 | ENSMUSG00000068196 | Col8a1   | -1.8323 | 3.01E-04 |
| 410 | ENSMUSG00000027015 | Cybrd1   | -2.2941 | 1.18E-04 |
| 411 | ENSMUSG00000027574 | Nkain4   | -2.0756 | 4.18E-05 |
| 412 | ENSMUSG00000024781 | Lipa     | -1.6981 | 8.65E-06 |
| 413 | ENSMUSG00000021189 | Atxn3    | -0.9921 | 2.02E-04 |
| 414 | ENSMUSG00000025232 | Hexa     | -1.1423 | 1.92E-04 |
| 415 | ENSMUSG00000015340 | Cybb     | -2.6505 | 1.00E-08 |
| 416 | ENSMUSG00000024782 | Ak3      | -1.0907 | 1.89E-04 |
| 417 | ENSMUSG00000053716 | Dusp7    | -1.3529 | 3.11E-04 |
| 418 | ENSMUSG00000019849 | Prep     | -2.6126 | 1.69E-06 |
| 419 | ENSMUSG00000030357 | Fkbp4    | -1.7413 | 6.96E-05 |

|     |                    |           |         |          |
|-----|--------------------|-----------|---------|----------|
| 420 | ENSMUSG00000033059 | Pygb      | -1.7370 | 2.63E-04 |
| 421 | ENSMUSG00000017760 | Ctsa      | -1.2253 | 1.37E-04 |
| 422 | ENSMUSG00000048440 | Cyp4f16   | -2.2622 | 6.75E-07 |
| 423 | ENSMUSG00000024013 | Fgd2      | -1.5073 | 5.50E-05 |
| 424 | ENSMUSG00000000903 | Vpreb3    | -5.7178 | 5.99E-06 |
| 425 | ENSMUSG00000028944 | Prkag2    | -1.7293 | 1.43E-04 |
| 426 | ENSMUSG00000035064 | Eef2k     | -2.6956 | 2.58E-06 |
| 427 | ENSMUSG00000048824 | Gm568     | -1.7044 | 6.72E-05 |
| 428 | ENSMUSG00000020898 | Ctc1      | -1.8078 | 4.02E-05 |
| 429 | ENSMUSG00000029270 | Fam69a    | -1.4415 | 2.38E-05 |
| 430 | ENSMUSG00000058799 | Nap1l1    | -1.0943 | 9.24E-06 |
| 431 | ENSMUSG00000043664 | Tmem221   | -5.2109 | 3.07E-04 |
| 432 | ENSMUSG00000005540 | Fcer2a    | -6.0130 | 6.93E-05 |
| 433 | ENSMUSG00000053044 | Cd8b1     | -4.6769 | 2.68E-04 |
| 434 | ENSMUSG00000086763 | Plxna4os1 | -3.6646 | 1.30E-04 |
| 435 | ENSMUSG00000020653 | Klf11     | -1.4061 | 8.23E-05 |
| 436 | ENSMUSG00000054517 | Trim65    | -1.7359 | 2.61E-04 |
| 437 | ENSMUSG00000030223 | Ptpro     | -3.1822 | 3.45E-05 |
| 438 | ENSMUSG00000024673 | Ms4a1     | -3.4041 | 1.08E-04 |
| 439 | ENSMUSG00000014846 | Tppp3     | -2.3603 | 4.22E-07 |
| 440 | ENSMUSG00000000740 | Rpl13     | -0.8107 | 2.53E-04 |
| 441 | ENSMUSG00000037548 | H2-DMb2   | -1.6140 | 1.30E-04 |
| 442 | ENSMUSG00000003379 | Cd79a     | -2.4439 | 6.86E-06 |
| 443 | ENSMUSG00000040592 | Cd79b     | -2.7475 | 4.10E-05 |
| 444 | ENSMUSG00000034634 | Ly6d      | -3.9070 | 1.65E-05 |
| 445 | ENSMUSG00000076937 | Iglc2     | -4.4570 | 5.39E-06 |
| 446 | ENSMUSG00000030724 | Cd19      | -3.0227 | 1.00E-05 |
| 447 | ENSMUSG00000076609 | Igkc      | -3.4391 | 1.12E-06 |
| 448 | ENSMUSG00000076934 | Iglv1     | -4.8920 | 1.58E-04 |
| 449 | ENSMUSG00000094797 | Igkv6-15  | -4.8615 | 4.88E-05 |
| 450 | ENSMUSG00000048498 | Cd300e    | -3.5672 | 8.09E-05 |
| 451 | ENSMUSG00000032915 | Adgre4    | -3.1951 | 7.20E-05 |
| 452 | ENSMUSG00000060600 | Eno3      | -2.8514 | 1.95E-04 |
| 453 | ENSMUSG00000048058 | Ldlrad3   | -2.2551 | 2.62E-04 |
| 454 | ENSMUSG00000033033 | Calhm2    | -3.2794 | 4.38E-05 |
| 455 | ENSMUSG00000033316 | Galnt9    | -4.8469 | 1.98E-04 |
| 456 | ENSMUSG00000043832 | Clec4a3   | -1.9993 | 4.23E-05 |
| 457 | ENSMUSG00000021880 | Rnase6    | -3.1097 | 1.58E-05 |
| 458 | ENSMUSG00000006611 | Hfe       | -2.2874 | 1.75E-05 |
| 459 | ENSMUSG00000040616 | Tmem51    | -2.8551 | 1.87E-04 |
| 460 | ENSMUSG00000044229 | Nxpe4     | -3.5886 | 1.70E-04 |
| 461 | ENSMUSG00000052160 | Pld4      | -3.2424 | 3.81E-06 |
| 462 | ENSMUSG00000049625 | Tifab     | -2.4829 | 1.14E-04 |

|     |                    |           |         |          |
|-----|--------------------|-----------|---------|----------|
| 463 | ENSMUSG00000040964 | Arhgef10l | -2.8170 | 2.95E-04 |
| 464 | ENSMUSG00000030091 | Nup210    | -2.6074 | 1.66E-04 |
| 465 | ENSMUSG00000005583 | Mef2c     | -1.7006 | 7.68E-05 |
| 466 | ENSMUSG00000061132 | Blnk      | -2.7789 | 2.85E-04 |
| 467 | ENSMUSG00000037944 | Ccr7      | -2.4069 | 4.67E-05 |
| 468 | ENSMUSG00000022336 | Eif3e     | -1.0129 | 9.73E-05 |
| 469 | ENSMUSG00000048371 | Pdp2      | -1.2387 | 3.14E-04 |
| 470 | ENSMUSG00000022817 | Itgb5     | -1.2995 | 2.00E-04 |
| 471 | ENSMUSG00000001270 | Ckb       | -1.6943 | 1.56E-05 |
| 472 | ENSMUSG00000058558 | Rpl5      | -0.7793 | 1.83E-04 |
| 473 | ENSMUSG00000008668 | Rps18     | -0.8795 | 1.93E-04 |
| 474 | ENSMUSG00000057841 | Rpl32     | -0.8495 | 1.59E-04 |
| 475 | ENSMUSG00000022982 | Sod1      | -0.9732 | 1.56E-04 |
| 476 | ENSMUSG00000038127 | Ccdc50    | -2.0746 | 3.35E-05 |
| 477 | ENSMUSG00000036606 | Plxnb2    | -2.5239 | 3.08E-06 |
| 478 | ENSMUSG00000021262 | Evl       | -3.4342 | 8.10E-05 |
| 479 | ENSMUSG00000026170 | Cyp27a1   | -3.7573 | 2.88E-04 |
| 480 | ENSMUSG00000027994 | Mcub      | -2.5517 | 5.86E-05 |
| 481 | ENSMUSG00000004707 | Ly9       | -2.6331 | 2.33E-04 |
| 482 | ENSMUSG00000000278 | Scpep1    | -1.6366 | 5.45E-05 |
| 483 | ENSMUSG00000070873 | Lilra5    | -2.1285 | 6.89E-05 |
| 484 | ENSMUSG00000024677 | Ms4a6b    | -1.9612 | 1.56E-04 |
| 485 | ENSMUSG00000079419 | Ms4a6c    | -1.9223 | 1.09E-04 |
| 486 | ENSMUSG00000027187 | Cat       | -2.0793 | 4.23E-07 |
| 487 | ENSMUSG00000006360 | Crip1     | -1.9810 | 1.69E-06 |
| 488 | ENSMUSG00000026317 | Cln8      | -2.6608 | 5.39E-06 |
| 489 | ENSMUSG00000021423 | Ly86      | -3.0909 | 9.72E-06 |
| 490 | ENSMUSG00000015355 | Cd48      | -1.9564 | 6.62E-05 |
| 491 | ENSMUSG00000026496 | Parp1     | -2.8185 | 1.00E-04 |
| 492 | ENSMUSG00000039497 | Dse       | -2.1337 | 3.26E-05 |
| 493 | ENSMUSG00000072596 | Ear2      | -2.1674 | 2.05E-05 |
| 494 | ENSMUSG00000006281 | Tep1      | -1.7102 | 2.80E-04 |
| 495 | ENSMUSG00000028085 | Gatb      | -2.2965 | 1.41E-04 |
| 496 | ENSMUSG00000027863 | Cd2       | -2.5162 | 8.83E-05 |
| 497 | ENSMUSG00000001642 | Akr1b3    | -1.5627 | 2.08E-05 |
| 498 | ENSMUSG00000003420 | Fcgrt     | -1.4152 | 6.09E-05 |
| 499 | ENSMUSG00000026548 | Slamf9    | -2.4612 | 3.16E-04 |
| 500 | ENSMUSG00000025203 | Scd2      | -1.7970 | 2.63E-04 |
